# Supplementary material for: eDNA, Amyloid Fibers and Membrane Vesicles Identified in Pseudomonas fluorescens SBW25 Biofilms
Source: MDPI journal article supplement (doi:10.3390/ijms232315096), 2022-12-01
Supplement: s1 [file s1]

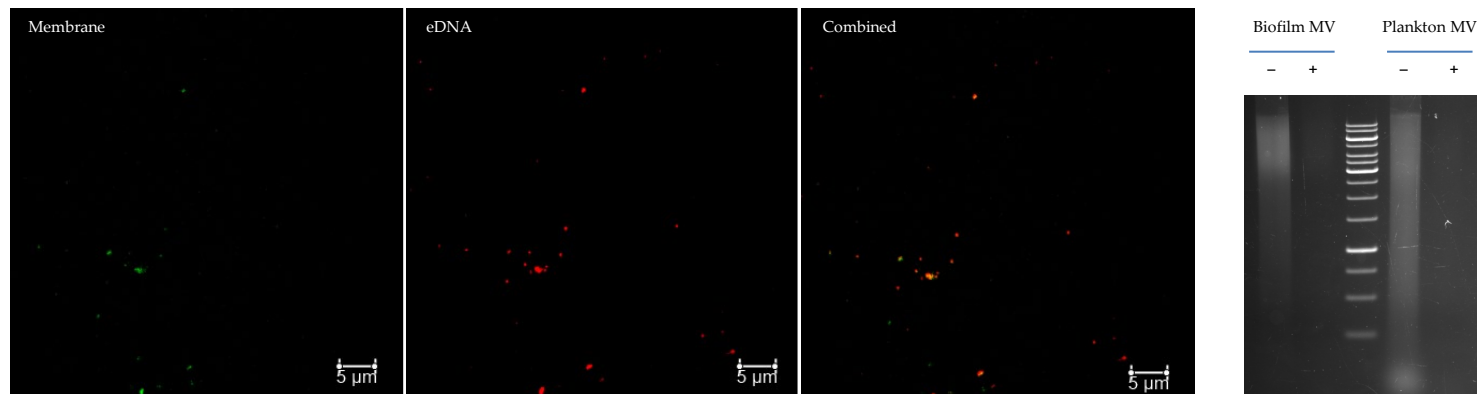

**Figure S3.** eDNA is associated with membrane vesicles. Membrane vesicles (MVs) were isolated from Wrinkly Spreader biofilms and planktonic samples and investigated by CLSM and DNA electrophoresis. Shown here (left) are single-channel and composite images of a biofilm sample with Vybrant DiO (green channel) and ethidium bromide (red channel) used to visualize MVs and eDNA, respectively. The scale bars indicate 5 µm. Also shown (right) are biofilm and planktonic MV samples pre-treated with DNase 1 (+) before electrophoresis with an aliquot of O'GeneRuler 1 kb DNA ladder run in the central lane for reference.
