# Supplementary material for: eDNA, Amyloid Fibers and Membrane Vesicles Identified in Pseudomonas fluorescens SBW25 Biofilms
Source: MDPI journal article supplement (doi:10.3390/ijms232315096), 2022-12-01
Supplement: s1 [file s1]

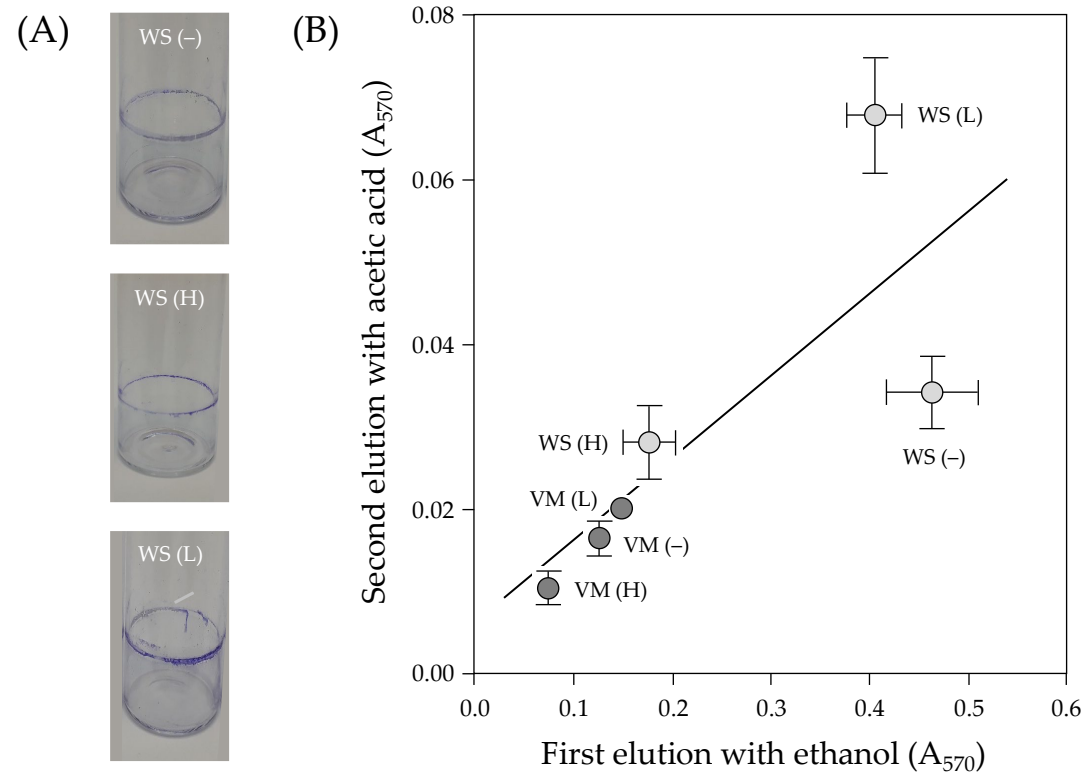

**Figure S1.** LMW DNA enhances Crystal violet staining of the meniscus region in Wrinkly Spreader microcosms. Shown here (A) are 3 day-old Wrinkly Spreader microcosms which have been stained with Crystal violet to indicate cells adhered to the vial walls at the meniscus, and (B) absorbance ( $A_{570}$ ) measurements of Crystal violet eluted first by ethanol ( $x$ -axis) and then by acetic acid ( $y$ -axis). Means ( $n = 8 - 24$ )  $\pm$  SE are shown. See the main text for statistical differences. The diagonal line indicates the correlation between first and second elutions (Spearman's  $Rho = 0.78$ ).
