# Supplementary material for: eDNA, Amyloid Fibers and Membrane Vesicles Identified in Pseudomonas fluorescens SBW25 Biofilms
Source: MDPI journal article supplement (doi:10.3390/ijms232315096), 2022-12-01
Supplement: s1 [file s1]

**Biofilm matrix sample**

Note: Human contaminants removed.

| ID                          | Protein                                                                                        | prot_score | emPAI |
|-----------------------------|------------------------------------------------------------------------------------------------|------------|-------|
| gi 229364771 emb CAY52770.1 | elongation factor TU [Pseudomonas fluorescens SBW25]                                           | 11287      | 10.9  |
| gi 229364759 emb CAY52749.1 | 50S ribosomal protein L14 [Pseudomonas fluorescens SBW25]                                      | 650        | 9.09  |
| gi 229364173 emb CAY51832.1 | putative ferritin DPS-family DNA binding protein [Pseudomonas fluorescens SBW25]               | 2142       | 6.17  |
| gi 229364240 emb CAY51939.1 | chaperone Hsp60, peptide-dependent ATPase, heat shock protein [Pseudomonas fluorescens SBW25]  | 9591       | 4.53  |
| gi 229360727 emb CAY47585.1 | putative membrane protein [Pseudomonas fluorescens SBW25]                                      | 1059       | 3.64  |
| gi 229361881 emb CAY48781.1 | ferripyoverdine receptor precursor [Pseudomonas fluorescens SBW25]                             | 13476      | 3.15  |
| gi 229365347 emb CAY53725.1 | ATP synthase beta chain [Pseudomonas fluorescens SBW25]                                        | 4471       | 2.7   |
| gi 229361202 emb CAY48066.1 | succinate dehydrogenase iron-sulfur protein [Pseudomonas fluorescens SBW25]                    | 1915       | 2.4   |
| gi 229364757 emb CAY52745.1 | 50S ribosomal protein L5 [Pseudomonas fluorescens SBW25]                                       | 659        | 2.32  |
| gi 229364222 emb CAY51910.1 | haem utilisation protein [Pseudomonas fluorescens SBW25]                                       | 496        | 2.11  |
| gi 229364824 emb CAY52855.1 | conserved hypothetical protein [Pseudomonas fluorescens SBW25]                                 | 3803       | 2.09  |
| gi 229359711 emb CAY46559.1 | conserved hypothetical protein [Pseudomonas fluorescens SBW25]                                 | 424        | 2.08  |
| gi 229365218 emb CAY53512.1 | acetylglutamate kinase [Pseudomonas fluorescens SBW25]                                         | 1343       | 2.05  |
| gi 229363881 emb CAY51363.1 | putative outer membrane porin A protein [Pseudomonas fluorescens SBW25]                        | 7857       | 1.82  |
| gi 229363442 emb CAY50639.1 | 50S ribosomal protein L20 [Pseudomonas fluorescens SBW25]                                      | 49         | 1.82  |
| gi 229364725 emb CAY52696.1 | putative ABC transport system, outer membrane exported protein [Pseudomonas fluorescens SBW25] | 435        | 1.74  |
| gi 229361883 emb CAY48783.1 | putative pyoverdine synthetase F [Pseudomonas fluorescens SBW25]                               | 2743       | 1.72  |
| gi 229364778 emb CAY52781.1 | 50S ribosomal protein L10 [Pseudomonas fluorescens SBW25]                                      | 1487       | 1.69  |
| gi 229364221 emb CAY51907.1 | putative exported heme receptor protein [Pseudomonas fluorescens SBW25]                        | 8771       | 1.64  |
| gi 229364763 emb CAY52756.1 | 30S ribosomal protein S3 [Pseudomonas fluorescens SBW25]                                       | 343        | 1.62  |
| gi 229360144 emb CAY47001.1 | ribose-phosphate pyrophosphokinase [Pseudomonas fluorescens SBW25]                             | 1083       | 1.56  |
| gi 229360670 emb CAY47528.1 | elongation factor [Pseudomonas fluorescens SBW25]                                              | 433        | 1.56  |
| gi 229364311 emb CAY52052.1 | nucleoside diphosphate kinase [Pseudomonas fluorescens SBW25]                                  | 848        | 1.54  |
| gi 229363277 emb CAY50379.1 | outer membrane efflux protein [Pseudomonas fluorescens SBW25]                                  | 1225       | 1.53  |
| gi 229365349 emb CAY53727.1 | ATP synthase alpha chain [Pseudomonas fluorescens SBW25]                                       | 3739       | 1.49  |
| gi 229362497 emb CAY49404.1 | conserved hypothetical protein [Pseudomonas fluorescens SBW25]                                 | 859        | 1.49  |
| gi 229360462 emb CAY47319.1 | cytosol aminopeptidase [Pseudomonas fluorescens SBW25]                                         | 3238       | 1.45  |
| gi 229363728 emb CAY51128.1 | flagellin [Pseudomonas fluorescens SBW25]                                                      | 3882       | 1.43  |
| gi 229365095 emb CAY53304.1 | putative outer membrane protein [Pseudomonas fluorescens SBW25]                                | 2004       | 1.41  |
| gi 229364744 emb CAY52723.1 | DNA-directed RNA polymerase alpha chain [Pseudomonas fluorescens SBW25]                        | 1181       | 1.41  |
| gi 229364790 emb CAY52800.1 | N-acetyl-gamma-glutamyl-phosphate reductase [Pseudomonas fluorescens SBW25]                    | 794        | 1.41  |
| gi 229359883 emb CAY46736.1 | pyruvate dehydrogenase E1 component [Pseudomonas fluorescens SBW25]                            | 3865       | 1.4   |
| gi 229365134 emb CAY53370.1 | thioredoxin [Pseudomonas fluorescens SBW25]                                                    | 163        | 1.39  |
| gi 229363660 emb CAY51010.1 | diaminobutyrate--2-oxoglutarate aminotransferase [Pseudomonas fluorescens SBW25]               | 2149       | 1.38  |
| gi 229364145 emb CAY51782.1 | ornithine carbamoyltransferase, catabolic [Pseudomonas fluorescens SBW25]                      | 1382       | 1.34  |
| gi 229364712 emb CAY52676.1 | 6,7-dimethyl-8-ribityllumazine synthase [Pseudomonas fluorescens SBW25]                        | 892        | 1.34  |

|                             |                                                                                                                           |      |      |
|-----------------------------|---------------------------------------------------------------------------------------------------------------------------|------|------|
| gi 229365209 emb CAY53495.1 | putative aldehyde dehydrogenase [Pseudomonas fluorescens SBW25]                                                           | 604  | 1.27 |
| gi 229362083 emb CAY48985.1 | putative short chain dehydrogenase [Pseudomonas fluorescens SBW25]                                                        | 291  | 1.25 |
| gi 229364752 emb CAY52736.1 | 30S ribosomal protein S5 [Pseudomonas fluorescens SBW25]                                                                  | 179  | 1.21 |
| gi 229361551 emb CAY48427.1 | two-component system, response regulator [Pseudomonas fluorescens SBW25]                                                  | 121  | 1.15 |
| gi 229365227 emb CAY53528.1 | conserved hypothetical protein [Pseudomonas fluorescens SBW25]                                                            | 370  | 1.15 |
| gi 229364746 emb CAY52727.1 | 30S ribosomal protein S11 [Pseudomonas fluorescens SBW25]                                                                 | 64   | 1.14 |
| gi 229361036 emb CAY47898.1 | 30S ribosomal protein S1 [Pseudomonas fluorescens SBW25]                                                                  | 1286 | 1.13 |
| gi 229359682 emb CAY46530.1 | putative oxidoreductase [Pseudomonas fluorescens SBW25]                                                                   | 477  | 1.12 |
| gi 229363225 emb CAY50308.1 | DNA-binding protein HU-beta [Pseudomonas fluorescens SBW25]                                                               | 334  | 1.09 |
| gi 229363273 emb CAY50374.1 | putative L-ornithine 5-monooxygenase [Pseudomonas fluorescens SBW25]                                                      | 2964 | 1.08 |
| gi 229364779 emb CAY52783.1 | 50S ribosomal protein L1 [Pseudomonas fluorescens SBW25]                                                                  | 737  | 1.08 |
| gi 229363652 emb CAY50995.1 | cell division inhibitor [Pseudomonas fluorescens SBW25]                                                                   | 647  | 1.08 |
| gi 229365256 emb CAY53574.1 | chaperone [Pseudomonas fluorescens SBW25]                                                                                 | 1289 | 1.04 |
| gi 229359882 emb CAY46735.1 | dihydrolipoyllysine-residue acetyltransferase component of pyruvate dehydrogenase complex [Pseudomonas fluorescens SBW25] | 3298 | 1.03 |
| gi 229360251 emb CAY47108.1 | 30S ribosomal protein S9 [Pseudomonas fluorescens SBW25]                                                                  | 95   | 1.03 |
| gi 229364468 emb CAY52297.1 | ketol-acid reductoisomerase [Pseudomonas fluorescens SBW25]                                                               | 1754 | 1    |
| gi 229360318 emb CAY47175.1 | putative lipoprotein [Pseudomonas fluorescens SBW25]                                                                      | 2746 | 0.98 |
| gi 229364964 emb CAY53084.1 | putative exported protein [Pseudomonas fluorescens SBW25]                                                                 | 603  | 0.98 |
| gi 229359943 emb CAY46797.1 | putative phage-related protein [Pseudomonas fluorescens SBW25]                                                            | 998  | 0.94 |
| gi 229360872 emb CAY47731.1 | phosphoribosylaminoimidazole-succinocarboxamide synthase [Pseudomonas fluorescens SBW25]                                  | 698  | 0.94 |
| gi 229360669 emb CAY47527.1 | 30S ribosomal protein S2 [Pseudomonas fluorescens SBW25]                                                                  | 798  | 0.93 |
| gi 229360143 emb CAY47000.1 | putative ribosomal protein L25p family [Pseudomonas fluorescens SBW25]                                                    | 240  | 0.92 |
| gi 229359944 emb CAY46798.1 | putative phage-related protein [Pseudomonas fluorescens SBW25]                                                            | 333  | 0.91 |
| gi 229359623 emb CAY46465.1 | 4-aminobutyrate aminotransferase [Pseudomonas fluorescens SBW25]                                                          | 1342 | 0.9  |
| gi 229360243 emb CAY47100.1 | putative membrane protein [Pseudomonas fluorescens SBW25]                                                                 | 102  | 0.9  |
| gi 229364385 emb CAY52165.1 | putative aminotransferase [Pseudomonas fluorescens SBW25]                                                                 | 334  | 0.89 |
| gi 229360012 emb CAY46866.1 | putative outer membrane protein [Pseudomonas fluorescens SBW25]                                                           | 785  | 0.88 |
| gi 229363109 emb CAY50118.1 | isocitrate dehydrogenase [NADP] [Pseudomonas fluorescens SBW25]                                                           | 1675 | 0.88 |
| gi 229359622 emb CAY46464.1 | succinate-semialdehyde dehydrogenase [NADP+] [Pseudomonas fluorescens SBW25]                                              | 909  | 0.87 |
| gi 229359816 emb CAY46666.1 | ubiquinone/menaquinone biosynthesis methyltransferase [Pseudomonas fluorescens SBW25]                                     | 108  | 0.87 |
| gi 229360534 emb CAY47391.1 | putative aminotransferase [Pseudomonas fluorescens SBW25]                                                                 | 1236 | 0.86 |
| gi 229364178 emb CAY51840.1 | putative family S43 non-peptidase homologue [Pseudomonas fluorescens SBW25]                                               | 1171 | 0.85 |
| gi 229363994 emb CAY51541.1 | ribonucleoside-diphosphate reductase alpha chain [Pseudomonas fluorescens SBW25]                                          | 2773 | 0.84 |
| gi 229364772 emb CAY52772.1 | elongation factor G [Pseudomonas fluorescens SBW25]                                                                       | 2159 | 0.84 |
| gi 229360305 emb CAY47162.1 | ATP phosphoribosyltransferase [Pseudomonas fluorescens SBW25]                                                             | 159  | 0.84 |
| gi 260594103 gb ACX46346.1  | RpoB, partial [Pseudomonas fluorescens SBW25]                                                                             | 351  | 0.83 |
| gi 229363228 emb CAY50311.1 | ATP-dependent Clp protease proteolytic subunit ClpP [Pseudomonas fluorescens SBW25]                                       | 480  | 0.83 |
| gi 229360601 emb CAY47458.1 | ferredoxin--NADP reductase [Pseudomonas fluorescens SBW25]                                                                | 93   | 0.82 |
| gi 229361207 emb CAY48071.1 | succinyl-CoA synthetase alpha chain [Pseudomonas fluorescens SBW25]                                                       | 181  | 0.81 |
| gi 229364160 emb CAY51808.1 | putative OmpA family lipoprotein [Pseudomonas fluorescens SBW25]                                                          | 3164 | 0.81 |

|                             |                                                                                                                            |      |      |
|-----------------------------|----------------------------------------------------------------------------------------------------------------------------|------|------|
| gi 229363110 emb CAY50120.1 | isocitrate dehydrogenase [NADP] [Pseudomonas fluorescens SBW25]                                                            | 1968 | 0.8  |
| gi 229364573 emb CAY52457.1 | conserved hypothetical ABC transport, membrane protein [Pseudomonas fluorescens SBW25]                                     | 927  | 0.8  |
| gi 229363689 emb CAY51060.1 | chemotaxis protein CheW [Pseudomonas fluorescens SBW25]                                                                    | 77   | 0.8  |
| gi 229364498 emb CAY52345.1 | polynucleotide phosphorylase/polyadenylase [Pseudomonas fluorescens SBW25]                                                 | 3009 | 0.79 |
| gi 229362326 emb CAY49228.1 | putative aldo/keto reductase [Pseudomonas fluorescens SBW25]                                                               | 788  | 0.79 |
| gi 229361205 emb CAY48069.1 | dihydrolipoyl dehydrogenase [Pseudomonas fluorescens SBW25]                                                                | 518  | 0.78 |
| gi 229360869 emb CAY47728.1 | dihydrodipicolinate synthase [Pseudomonas fluorescens SBW25]                                                               | 561  | 0.77 |
| gi 229365250 emb CAY53564.1 | conserved hypothetical protein [Pseudomonas fluorescens SBW25]                                                             | 774  | 0.77 |
| gi 229363172 emb CAY50218.1 | peptidyl-prolyl cis-trans isomerase B [Pseudomonas fluorescens SBW25]                                                      | 393  | 0.77 |
| gi 229365348 emb CAY53726.1 | ATP synthase gamma chain [Pseudomonas fluorescens SBW25]                                                                   | 469  | 0.76 |
| gi 229363264 emb CAY50358.1 | lipamide acyltransferase component of branched-chain alpha-keto acid dehydrogenase complex [Pseudomonas fluorescens SBW25] | 564  | 0.75 |
| gi 229363458 emb CAY50667.1 | putative L-asparaginase II precursor [Pseudomonas fluorescens SBW25]                                                       | 538  | 0.74 |
| gi 229361138 emb CAY48001.1 | molybdenum cofactor biosynthesis protein B [Pseudomonas fluorescens SBW25]                                                 | 404  | 0.74 |
| gi 229360153 emb CAY47010.1 | putative exported protein [Pseudomonas fluorescens SBW25]                                                                  | 101  | 0.74 |
| gi 229360774 emb CAY47632.1 | outer membrane protein precursor [Pseudomonas fluorescens SBW25]                                                           | 955  | 0.73 |
| gi 229360293 emb CAY47150.1 | putative ABC transport system, ATP-binding protein [Pseudomonas fluorescens SBW25]                                         | 118  | 0.71 |
| gi 229364518 emb CAY52373.1 | chaperone protein DnaK (HSP70) [Pseudomonas fluorescens SBW25]                                                             | 2267 | 0.7  |
| gi 229360973 emb CAY47833.1 | transaldolase B [Pseudomonas fluorescens SBW25]                                                                            | 187  | 0.7  |
| gi 229363895 emb CAY51388.1 | putative alanyl-tRNA synthetase [Pseudomonas fluorescens SBW25]                                                            | 316  | 0.7  |
| gi 229364775 emb CAY52776.1 | DNA-directed RNA polymerase beta~ chain [Pseudomonas fluorescens SBW25]                                                    | 3147 | 0.68 |
| gi 229360548 emb CAY47405.1 | glycerol kinase [Pseudomonas fluorescens SBW25]                                                                            | 1701 | 0.68 |
| gi 229365251 emb CAY53566.1 | conserved hypothetical protein [Pseudomonas fluorescens SBW25]                                                             | 1735 | 0.68 |
| gi 229363229 emb CAY50312.1 | trigger factor [Pseudomonas fluorescens SBW25]                                                                             | 759  | 0.68 |
| gi 229362316 emb CAY49218.1 | alkyl hydroperoxide reductase protein [Pseudomonas fluorescens SBW25]                                                      | 506  | 0.68 |
| gi 229363888 emb CAY51376.1 | putative phosphoenolpyruvate synthase [Pseudomonas fluorescens SBW25]                                                      | 2008 | 0.66 |
| gi 229363697 emb CAY51074.1 | chemotaxis protein CheY [Pseudomonas fluorescens SBW25]                                                                    | 169  | 0.65 |
| gi 229364995 emb CAY53133.1 | aspartate carbamoyltransferase [Pseudomonas fluorescens SBW25]                                                             | 309  | 0.64 |
| gi 229360254 emb CAY47111.1 | putative ubiquinol--cytochrome C reductase, cytochrome C1 [Pseudomonas fluorescens SBW25]                                  | 180  | 0.63 |
| gi 229361880 emb CAY48780.1 | pvdj(2) [Pseudomonas fluorescens SBW25]                                                                                    | 7522 | 0.62 |
| gi 229364817 emb CAY52842.1 | putative exported organic solvent tolerance protein [Pseudomonas fluorescens SBW25]                                        | 521  | 0.62 |
| gi 229360360 emb CAY47217.1 | cell division protein [Pseudomonas fluorescens SBW25]                                                                      | 336  | 0.62 |
| gi 229360557 emb CAY47414.1 | putative alkyl hydroperoxide reductase [Pseudomonas fluorescens SBW25]                                                     | 495  | 0.62 |
| gi 229363782 emb CAY51208.1 | GTP pyrophosphokinase [Pseudomonas fluorescens SBW25]                                                                      | 429  | 0.61 |
| gi 229360249 emb CAY47106.1 | NADP(H)-dependt aldo-keto reductase [Pseudomonas fluorescens SBW25]                                                        | 346  | 0.59 |
| gi 229364776 emb CAY52777.1 | DNA-directed RNA polymerase beta chain [Pseudomonas fluorescens SBW25]                                                     | 1409 | 0.58 |
| gi 229362693 emb CAY49603.1 | putative ferric alcaligin siderophore receptor [Pseudomonas fluorescens SBW25]                                             | 1899 | 0.58 |
| gi 229361201 emb CAY48065.1 | succinate dehydrogenase flavoprotein subunit [Pseudomonas fluorescens SBW25]                                               | 1979 | 0.58 |
| gi 229359726 emb CAY46574.1 | outer membrane protein, oprE3 precursor [Pseudomonas fluorescens SBW25]                                                    | 1656 | 0.58 |
| gi 229364115 emb CAY51736.1 | putative exported protein [Pseudomonas fluorescens SBW25]                                                                  | 1185 | 0.58 |
| gi 229362111 emb CAY49013.1 | putative ribonucleoside-diphosphate reductase beta chain [Pseudomonas fluorescens SBW25]                                   | 178  | 0.58 |

|                             |                                                                                                                       |      |      |
|-----------------------------|-----------------------------------------------------------------------------------------------------------------------|------|------|
| gi 229364032 emb CAY51597.1 | ribonucleoside-diphosphate reductase beta chain [Pseudomonas fluorescens SBW25]                                       | 161  | 0.58 |
| gi 229364521 emb CAY52377.1 | ferric uptake regulation protein [Pseudomonas fluorescens SBW25]                                                      | 167  | 0.58 |
| gi 229360742 emb CAY47600.1 | branched amino acid ABC transport system, substrate-binding protein [Pseudomonas fluorescens SBW25]                   | 503  | 0.57 |
| gi 229364415 emb CAY52212.1 | putative putative oxidoreductase [Pseudomonas fluorescens SBW25]                                                      | 210  | 0.56 |
| gi 229360807 emb CAY47665.1 | probable alcohol dehydrogenase [Pseudomonas fluorescens SBW25]                                                        | 228  | 0.56 |
| gi 229360927 emb CAY47787.1 | putative ATP-binding protein [Pseudomonas fluorescens SBW25]                                                          | 218  | 0.56 |
| gi 229362018 emb CAY48919.1 | putative ferric alcaligin siderophore receptor [Pseudomonas fluorescens SBW25]                                        | 559  | 0.55 |
| gi 229364293 emb CAY52028.1 | GMP synthase (glutamine-hydrolyzing) [Pseudomonas fluorescens SBW25]                                                  | 250  | 0.54 |
| gi 229361204 emb CAY48068.1 | dihydrolipoyllysine-residue succinyltransferase component of 2-oxoglutarate dehydrogenase complex [Pseudomonas fluore | 703  | 0.53 |
| gi 229362920 emb CAY49837.1 | L-lactate dehydrogenase [Pseudomonas fluorescens SBW25]                                                               | 108  | 0.53 |
| gi 229365230 emb CAY53532.1 | biopolymer transport membrane protein [Pseudomonas fluorescens SBW25]                                                 | 1740 | 0.53 |
| gi 229361882 emb CAY48782.1 | putative ABC transporter ATP-binding protein [Pseudomonas fluorescens SBW25]                                          | 734  | 0.52 |
| gi 229361046 emb CAY47908.1 | UDP-N-acetylglucosamine2-epimerase [Pseudomonas fluorescens SBW25]                                                    | 113  | 0.52 |
| gi 229364164 emb CAY51814.1 | TolQ protein [Pseudomonas fluorescens SBW25]                                                                          | 397  | 0.52 |
| gi 229363585 emb CAY50877.1 | putative putative heat shock protein A [Pseudomonas fluorescens SBW25]                                                | 192  | 0.52 |
| gi 229360685 emb CAY47543.1 | acetyl-coenzyme A carboxylase carboxyl transferase subunit alpha [Pseudomonas fluorescens SBW25]                      | 122  | 0.51 |
| gi 229361213 emb CAY48077.1 | chaperone (heat shock protein) [Pseudomonas fluorescens SBW25]                                                        | 322  | 0.5  |
| gi 229360955 emb CAY47815.1 | glyceraldehyde-3-phosphate dehydrogenase [Pseudomonas fluorescens SBW25]                                              | 278  | 0.5  |
| gi 229364318 emb CAY52065.1 | cysteine desulfurase [Pseudomonas fluorescens SBW25]                                                                  | 639  | 0.5  |
| gi 229363945 emb CAY51470.1 | electron transfer flavoprotein beta-subunit [Pseudomonas fluorescens SBW25]                                           | 365  | 0.5  |
| gi 229364503 emb CAY52353.1 | transcription termination factor [Pseudomonas fluorescens SBW25]                                                      | 900  | 0.49 |
| gi 229364218 emb CAY51902.1 | glyceraldehyde 3-phosphate dehydrogenase 1 [Pseudomonas fluorescens SBW25]                                            | 951  | 0.49 |
| gi 229361050 emb CAY47913.1 | putative dehydrogenase [Pseudomonas fluorescens SBW25]                                                                | 126  | 0.49 |
| gi 229363756 emb CAY51170.1 | putative fatty acid transport system, membrane protein [Pseudomonas fluorescens SBW25]                                | 427  | 0.48 |
| gi 229360407 emb CAY47264.1 | putative amino acid ABC transport system, substrate-binding protein [Pseudomonas fluorescens SBW25]                   | 94   | 0.48 |
| gi 229363928 emb CAY51444.1 | putative amino transferase [Pseudomonas fluorescens SBW25]                                                            | 912  | 0.48 |
| gi 229359974 emb CAY46828.1 | putative amino acid oxidase [Pseudomonas fluorescens SBW25]                                                           | 572  | 0.48 |
| gi 229362537 emb CAY49444.1 | putative TonB-dependent outer membrane receptor [Pseudomonas fluorescens SBW25]                                       | 1147 | 0.47 |
| gi 229364144 emb CAY51781.1 | arginine deiminase [Pseudomonas fluorescens SBW25]                                                                    | 1132 | 0.47 |
| gi 229365133 emb CAY53368.1 | transcription termination factor [Pseudomonas fluorescens SBW25]                                                      | 230  | 0.47 |
| gi 229363266 emb CAY50361.1 | putative branched-chain-amino-acid aminotransferase [Pseudomonas fluorescens SBW25]                                   | 226  | 0.47 |
| gi 229360544 emb CAY47401.1 | glutamate/aspartate ABC transport system, permease [Pseudomonas fluorescens SBW25]                                    | 228  | 0.47 |
| gi 229362357 emb CAY49259.1 | putative phenylacetic acid degradation enoyl-CoA hydratase [Pseudomonas fluorescens SBW25]                            | 593  | 0.47 |
| gi 229360942 emb CAY47802.1 | fatty oxidation complex alpha subunit [Pseudomonas fluorescens SBW25]                                                 | 624  | 0.46 |
| gi 229364474 emb CAY52307.1 | conserved hypothetical protein [Pseudomonas fluorescens SBW25]                                                        | 426  | 0.46 |
| gi 229360546 emb CAY47403.1 | aerobic glycerol-3-phosphate dehydrogenase [Pseudomonas fluorescens SBW25]                                            | 208  | 0.46 |
| gi 229360593 emb CAY47450.1 | recombinase A [Pseudomonas fluorescens SBW25]                                                                         | 499  | 0.46 |
| gi 229360496 emb CAY47353.1 | putative iron utilisation protein [Pseudomonas fluorescens SBW25]                                                     | 407  | 0.46 |
| gi 229364029 emb CAY51593.1 | putative histidine-binding periplasmic protein precursor [Pseudomonas fluorescens SBW25]                              | 80   | 0.46 |
| gi 229365246 emb CAY53558.1 | conserved hypothetical protein [Pseudomonas fluorescens SBW25]                                                        | 163  | 0.45 |

|                             |                                                                                                                  |      |      |
|-----------------------------|------------------------------------------------------------------------------------------------------------------|------|------|
| gi 229360089 emb CAY46943.1 | omega-amino acid--pyruvate aminotransferase [Pseudomonas fluorescens SBW25]                                      | 99   | 0.45 |
| gi 229359677 emb CAY46525.1 | putative ABC transport system, exported protein [Pseudomonas fluorescens SBW25]                                  | 485  | 0.45 |
| gi 229365081 emb CAY53280.1 | putrescine ABC transport system, substrate-binding periplasmic protein precursor [Pseudomonas fluorescens SBW25] | 336  | 0.44 |
| gi 229360687 emb CAY47545.1 | CTP synthase [Pseudomonas fluorescens SBW25]                                                                     | 196  | 0.44 |
| gi 229364186 emb CAY51851.1 | preprotein translocase, ATPase secretion component (General Secretory Pathway) [Pseudomonas fluorescens SBW25]   | 1047 | 0.43 |
| gi 229364150 emb CAY51790.1 | glycine dehydrogenase [decarboxylating] [Pseudomonas fluorescens SBW25]                                          | 661  | 0.43 |
| gi 229360333 emb CAY47190.1 | putative exported protein [Pseudomonas fluorescens SBW25]                                                        | 284  | 0.43 |
| gi 229365217 emb CAY53511.1 | putative phosphomannomutase/phosphoglucomutase [Pseudomonas fluorescens SBW25]                                   | 145  | 0.43 |
| gi 229364766 emb CAY52761.1 | 50S ribosomal protein L2 [Pseudomonas fluorescens SBW25]                                                         | 180  | 0.43 |
| gi 229363699 emb CAY51077.1 | ParA family ATPase [Pseudomonas fluorescens SBW25]                                                               | 90   | 0.43 |
| gi 229361985 emb CAY48885.1 | conserved hypothetical protein [Pseudomonas fluorescens SBW25]                                                   | 386  | 0.43 |
| gi 229361879 emb CAY48779.1 | pyoverdine synthetase I [Pseudomonas fluorescens SBW25]                                                          | 7077 | 0.42 |
| gi 229364959 emb CAY53075.1 | adenosylhomocysteinase [Pseudomonas fluorescens SBW25]                                                           | 853  | 0.42 |
| gi 229365169 emb CAY53427.1 | argininosuccinate lyase [Pseudomonas fluorescens SBW25]                                                          | 629  | 0.42 |
| gi 229359775 emb CAY46625.1 | glutamine synthetase [Pseudomonas fluorescens SBW25]                                                             | 1068 | 0.42 |
| gi 229361206 emb CAY48070.1 | succinyl-CoA synthetase beta chain [Pseudomonas fluorescens SBW25]                                               | 434  | 0.42 |
| gi 229364257 emb CAY51969.1 | threonine synthase [Pseudomonas fluorescens SBW25]                                                               | 306  | 0.42 |
| gi 229362358 emb CAY49260.1 | acyl-CoA dehydrogenase [Pseudomonas fluorescens SBW25]                                                           | 163  | 0.42 |
| gi 229364179 emb CAY51842.1 | putative transmembrane protein [Pseudomonas fluorescens SBW25]                                                   | 56   | 0.42 |
| gi 229365022 emb CAY53183.1 | putative sulfurtransferase [Pseudomonas fluorescens SBW25]                                                       | 53   | 0.42 |
| gi 229364202 emb CAY51876.1 | pyruvate kinase [Pseudomonas fluorescens SBW25]                                                                  | 391  | 0.41 |
| gi 229364294 emb CAY52029.1 | inosine-5~-monophosphate dehydrogenase [Pseudomonas fluorescens SBW25]                                           | 166  | 0.41 |
| gi 229362518 emb CAY49425.1 | 3-oxoacyl-[acyl-carrier-protein] synthase II [Pseudomonas fluorescens SBW25]                                     | 204  | 0.41 |
| gi 229363944 emb CAY51467.1 | electron transfer flavoprotein alpha-subunit [Pseudomonas fluorescens SBW25]                                     | 564  | 0.41 |
| gi 229363740 emb CAY51145.1 | aspartate aminotransferase [Pseudomonas fluorescens SBW25]                                                       | 364  | 0.4  |
| gi 229363900 emb CAY51397.1 | putative carboxyvinyl-carboxyphosphonate phosphorylmutase [Pseudomonas fluorescens SBW25]                        | 106  | 0.4  |
| gi 229363669 emb CAY51023.1 | pyoverdine synthetase A [Pseudomonas fluorescens SBW25]                                                          | 6067 | 0.39 |
| gi 229360677 emb CAY47535.1 | putative surface exported protein [Pseudomonas fluorescens SBW25]                                                | 1138 | 0.39 |
| gi 229360314 emb CAY47171.1 | probable malate:quinone oxidoreductase [Pseudomonas fluorescens SBW25]                                           | 114  | 0.39 |
| gi 229364996 emb CAY53136.1 | dihydroorotase-like protein [Pseudomonas fluorescens SBW25]                                                      | 735  | 0.39 |
| gi 229363896 emb CAY51390.1 | 2-methylcitrate dehydratase [Pseudomonas fluorescens SBW25]                                                      | 231  | 0.39 |
| gi 229361114 emb CAY47977.1 | probable protease (heat shock protein) [Pseudomonas fluorescens SBW25]                                           | 55   | 0.39 |
| gi 229361847 emb CAY48745.1 | putative TonB-receptor protein [Pseudomonas fluorescens SBW25]                                                   | 674  | 0.38 |
| gi 229363121 emb CAY50140.1 | NADH dehydrogenase I chain C/D [Pseudomonas fluorescens SBW25]                                                   | 224  | 0.38 |
| gi 229359832 emb CAY46682.1 | putative NADP-dependent malic enzyme [Pseudomonas fluorescens SBW25]                                             | 236  | 0.38 |
| gi 229365065 emb CAY53254.1 | D-3-phosphoglycerate dehydrogenase [Pseudomonas fluorescens SBW25]                                               | 194  | 0.38 |
| gi 229362483 emb CAY49389.1 | LysR-family transcriptional regulator [Pseudomonas fluorescens SBW25]                                            | 102  | 0.38 |
| gi 229359779 emb CAY46629.1 | glycogen phosphorylase [Pseudomonas fluorescens SBW25]                                                           | 282  | 0.37 |
| gi 229360628 emb CAY47486.1 | lysyl-tRNA synthetase [Pseudomonas fluorescens SBW25]                                                            | 126  | 0.37 |
| gi 229360561 emb CAY47418.1 | argininosuccinate synthase [Pseudomonas fluorescens SBW25]                                                       | 113  | 0.37 |

|                             |                                                                                                     |     |      |
|-----------------------------|-----------------------------------------------------------------------------------------------------|-----|------|
| gi 229360348 emb CAY47205.1 | S-adenosyl-methyltransferase [Pseudomonas fluorescens SBW25]                                        | 90  | 0.37 |
| gi 229364412 emb CAY52207.1 | thioredoxin reductase [Pseudomonas fluorescens SBW25]                                               | 70  | 0.37 |
| gi 229360286 emb CAY47143.1 | superoxide dismutase [Mn] [Pseudomonas fluorescens SBW25]                                           | 599 | 0.37 |
| gi 229364769 emb CAY52766.1 | 50S ribosomal protein L3 [Pseudomonas fluorescens SBW25]                                            | 245 | 0.37 |
| gi 229363655 emb CAY51001.1 | putative aspartyl aminopeptidase [Pseudomonas fluorescens SBW25]                                    | 134 | 0.36 |
| gi 229360306 emb CAY47163.1 | histidinol dehydrogenase [Pseudomonas fluorescens SBW25]                                            | 104 | 0.36 |
| gi 229362021 emb CAY48922.1 | putative 6-phosphogluconate dehydrogenase, decarboxylating [Pseudomonas fluorescens SBW25]          | 70  | 0.36 |
| gi 229360493 emb CAY47350.1 | putative TonB-dependent receptor [Pseudomonas fluorescens SBW25]                                    | 261 | 0.35 |
| gi 229364572 emb CAY52455.1 | NADP-specific glutamate dehydrogenase [Pseudomonas fluorescens SBW25]                               | 296 | 0.35 |
| gi 229363726 emb CAY51125.1 | putative flagellar hook associated protein (FlhD) [Pseudomonas fluorescens SBW25]                   | 81  | 0.35 |
| gi 229360663 emb CAY47521.1 | putative lysine biosynthesis-related protein [Pseudomonas fluorescens SBW25]                        | 152 | 0.35 |
| gi 229362520 emb CAY49427.1 | 3-oxoacyl-[acyl-carrier-protein] synthase [Pseudomonas fluorescens SBW25]                           | 141 | 0.35 |
| gi 229364014 emb CAY51571.1 | L-allo-threonine aldolase [Pseudomonas fluorescens SBW25]                                           | 151 | 0.35 |
| gi 229364579 emb CAY52465.1 | carbon starvation protein A [Pseudomonas fluorescens SBW25]                                         | 826 | 0.34 |
| gi 229360331 emb CAY47188.1 | putative medium-chain-fatty-acid--CoA ligase [Pseudomonas fluorescens SBW25]                        | 595 | 0.34 |
| gi 229360284 emb CAY47141.1 | fumarate hydratase class II [Pseudomonas fluorescens SBW25]                                         | 539 | 0.34 |
| gi 229364100 emb CAY51711.1 | putative porin [Pseudomonas fluorescens SBW25]                                                      | 416 | 0.34 |
| gi 229360168 emb CAY47025.1 | putative TonB-dependent exported protein [Pseudomonas fluorescens SBW25]                            | 157 | 0.33 |
| gi 229360235 emb CAY47092.1 | putative outer membrane porin [Pseudomonas fluorescens SBW25]                                       | 474 | 0.33 |
| gi 229360783 emb CAY47641.1 | putative reductase [Pseudomonas fluorescens SBW25]                                                  | 103 | 0.33 |
| gi 229361515 emb CAY48391.1 | probable succinyl-CoA:3-ketoacid-coenzyme A transferase subunit A [Pseudomonas fluorescens SBW25]   | 316 | 0.33 |
| gi 229362266 emb CAY49168.1 | putative TonB-dependent receptor YncD precursor [Pseudomonas fluorescens SBW25]                     | 489 | 0.32 |
| gi 229360271 emb CAY47128.1 | glutamyl-tRNA(Gln) amidotransferase subunit A [Pseudomonas fluorescens SBW25]                       | 162 | 0.32 |
| gi 229363170 emb CAY50215.1 | cysteinyl-tRNA synthetase [Pseudomonas fluorescens SBW25]                                           | 77  | 0.32 |
| gi 229363488 emb CAY50712.1 | putative 3-isopropylmalate dehydrogenase [Pseudomonas fluorescens SBW25]                            | 145 | 0.32 |
| gi 229361044 emb CAY47906.1 | polysaccharide biosynthesis protein [Pseudomonas fluorescens SBW25]                                 | 92  | 0.32 |
| gi 229361049 emb CAY47912.1 | putative 3-oxoacyl-[acyl-carrier-protein] synthase III [Pseudomonas fluorescens SBW25]              | 78  | 0.32 |
| gi 229363208 emb CAY50280.1 | conserved hypothetical protein [Pseudomonas fluorescens SBW25]                                      | 250 | 0.32 |
| gi 229360239 emb CAY47096.1 | putative exported protein [Pseudomonas fluorescens SBW25]                                           | 234 | 0.32 |
| gi 229362517 emb CAY49424.1 | putative acyl CoA oxidase [Pseudomonas fluorescens SBW25]                                           | 676 | 0.31 |
| gi 229364170 emb CAY51826.1 | aspartyl-tRNA synthetase [Pseudomonas fluorescens SBW25]                                            | 392 | 0.31 |
| gi 229359777 emb CAY46627.1 | putative elongation factor/GTP-binding protein TypA/BipA [Pseudomonas fluorescens SBW25]            | 569 | 0.31 |
| gi 229359838 emb CAY46690.1 | conserved hypothetical protein [Pseudomonas fluorescens SBW25]                                      | 139 | 0.31 |
| gi 229359912 emb CAY46766.1 | putative outer membrane protein [Pseudomonas fluorescens SBW25]                                     | 109 | 0.31 |
| gi 229362548 emb CAY49455.1 | putative secreted pectate lyase [Pseudomonas fluorescens SBW25]                                     | 426 | 0.31 |
| gi 229364152 emb CAY51794.1 | putative aminomethyltransferase (glycine cleavage system T protein) [Pseudomonas fluorescens SBW25] | 141 | 0.31 |
| gi 229360729 emb CAY47587.1 | conserved hypothetical protein [Pseudomonas fluorescens SBW25]                                      | 67  | 0.31 |
| gi 229362815 emb CAY49725.1 | conserved hypothetical protein [Pseudomonas fluorescens SBW25]                                      | 331 | 0.3  |
| gi 229359698 emb CAY46546.1 | phosphoenolpyruvate carboxykinase [ATP] [Pseudomonas fluorescens SBW25]                             | 303 | 0.3  |
| gi 229361426 emb CAY48301.1 | cysteine desulfurase [Pseudomonas fluorescens SBW25]                                                | 219 | 0.3  |

|                             |                                                                                                                     |     |      |
|-----------------------------|---------------------------------------------------------------------------------------------------------------------|-----|------|
| gi 229360943 emb CAY47803.1 | 3-ketoacyl-CoA thiolase [Pseudomonas fluorescens SBW25]                                                             | 207 | 0.3  |
| gi 229365106 emb CAY53324.1 | putative aminotransferase [Pseudomonas fluorescens SBW25]                                                           | 119 | 0.3  |
| gi 229364304 emb CAY52041.1 | conserved hypothetical protein [Pseudomonas fluorescens SBW25]                                                      | 65  | 0.3  |
| gi 229364030 emb CAY51594.1 | acetyl-coenzyme A synthetase [Pseudomonas fluorescens SBW25]                                                        | 124 | 0.29 |
| gi 229363982 emb CAY51521.1 | putative ribonuclease E [Pseudomonas fluorescens SBW25]                                                             | 924 | 0.28 |
| gi 229360222 emb CAY47079.1 | putative ornithine decarboxylase [Pseudomonas fluorescens SBW25]                                                    | 92  | 0.28 |
| gi 229360636 emb CAY47494.1 | putative lipoprotein [Pseudomonas fluorescens SBW25]                                                                | 572 | 0.28 |
| gi 229363883 emb CAY51367.1 | putative membrane protein [Pseudomonas fluorescens SBW25]                                                           | 464 | 0.28 |
| gi 229359725 emb CAY46573.1 | purative iron-transport related exported protein [Pseudomonas fluorescens SBW25]                                    | 386 | 0.27 |
| gi 229364672 emb CAY52606.1 | gamma-glutamyl phosphate reductase [Pseudomonas fluorescens SBW25]                                                  | 246 | 0.27 |
| gi 229360304 emb CAY47161.1 | UDP-N-acetylglucosamine 1-carboxyvinyltransferase [Pseudomonas fluorescens SBW25]                                   | 152 | 0.27 |
| gi 229364104 emb CAY51718.1 | maltose-binding protein [Pseudomonas fluorescens SBW25]                                                             | 95  | 0.27 |
| gi 229361115 emb CAY47978.1 | putative aminotransferase [Pseudomonas fluorescens SBW25]                                                           | 73  | 0.27 |
| gi 229364419 emb CAY52219.1 | putative putative GTP-binding protein [Pseudomonas fluorescens SBW25]                                               | 68  | 0.27 |
| gi 229364013 emb CAY51570.1 | alanyl-tRNA synthetase [Pseudomonas fluorescens SBW25]                                                              | 164 | 0.26 |
| gi 229365226 emb CAY53526.1 | guanosine-3~,5~-bis(diphosphate) 3~-pyrophosphohydrolase [Pseudomonas fluorescens SBW25]                            | 118 | 0.26 |
| gi 229359946 emb CAY46800.1 | adenylosuccinate synthetase [Pseudomonas fluorescens SBW25]                                                         | 81  | 0.26 |
| gi 229362543 emb CAY49450.1 | putative non-ribosomal peptide synthetase [Pseudomonas fluorescens SBW25]                                           | 886 | 0.25 |
| gi 229365298 emb CAY53646.1 | oxaloacetate decarboxylase alpha chain [Pseudomonas fluorescens SBW25]                                              | 84  | 0.25 |
| gi 229361198 emb CAY48062.1 | citrate synthase [Pseudomonas fluorescens SBW25]                                                                    | 251 | 0.25 |
| gi 229364602 emb CAY52500.1 | putative ABC transport system, outer membrane protein [Pseudomonas fluorescens SBW25]                               | 97  | 0.25 |
| gi 229363860 emb CAY51327.1 | putative cell division protein [Pseudomonas fluorescens SBW25]                                                      | 591 | 0.25 |
| gi 229364606 emb CAY52504.1 | putative TonB-dependent receptor protein [Pseudomonas fluorescens SBW25]                                            | 159 | 0.24 |
| gi 229365055 emb CAY53239.1 | phosphoenolpyruvate-protein phosphotransferase [Pseudomonas fluorescens SBW25]                                      | 272 | 0.24 |
| gi 229364325 emb CAY52076.1 | preprotein translocase, auxillary membrane component (General Secretory Pathway) [Pseudomonas fluorescens SBW25]    | 97  | 0.24 |
| gi 229364247 emb CAY51951.1 | proline tRNA synthetase [Pseudomonas fluorescens SBW25]                                                             | 212 | 0.24 |
| gi 229363802 emb CAY51237.1 | ATP-dependent RNA helicase [Pseudomonas fluorescens SBW25]                                                          | 63  | 0.24 |
| gi 229365102 emb CAY53317.1 | putative membrane protein [Pseudomonas fluorescens SBW25]                                                           | 210 | 0.24 |
| gi 229360362 emb CAY47219.1 | UDP-3-O-[3-hydroxymyristoyl] N-acetylglucosamine deacetylase [Pseudomonas fluorescens SBW25]                        | 210 | 0.24 |
| gi 229360545 emb CAY47402.1 | glutamate/aspartate ABC transport system, periplasmic binding protein precursor [Pseudomonas fluorescens SBW25]     | 192 | 0.24 |
| gi 229361247 emb CAY48111.1 | acyl-coenzyme A dehydrogenase [Pseudomonas fluorescens SBW25]                                                       | 126 | 0.23 |
| gi 229364834 emb CAY52873.1 | RNA polymerase sigma factor (sigma-70) [Pseudomonas fluorescens SBW25]                                              | 288 | 0.23 |
| gi 229360090 emb CAY46944.1 | methylmalonate-semialdehyde dehydrogenase [Pseudomonas fluorescens SBW25]                                           | 223 | 0.23 |
| gi 229361277 emb CAY48141.1 | putative exported protein [Pseudomonas fluorescens SBW25]                                                           | 161 | 0.23 |
| gi 229363723 emb CAY51119.1 | putative two-component system, response regulator nitrogen regulation protein NR(I) [Pseudomonas fluorescens SBW25] | 325 | 0.22 |
| gi 229364686 emb CAY52632.1 | putative aldehyde dehydrogenase [Pseudomonas fluorescens SBW25]                                                     | 158 | 0.22 |
| gi 229361647 emb CAY48527.1 | methylmalonate-semialdehyde dehydrogenase [Pseudomonas fluorescens SBW25]                                           | 84  | 0.22 |
| gi 229362544 emb CAY49451.1 | putative non-ribosomal peptide synthetase [Pseudomonas fluorescens SBW25]                                           | 823 | 0.21 |
| gi 229364334 emb CAY52089.1 | putative ATP-binding protein [Pseudomonas fluorescens SBW25]                                                        | 137 | 0.21 |
| gi 229362000 emb CAY48901.1 | putative cobalamin biosynthesis-related protein [Pseudomonas fluorescens SBW25]                                     | 680 | 0.21 |

|                             |                                                                                                             |      |      |
|-----------------------------|-------------------------------------------------------------------------------------------------------------|------|------|
| gi 229363125 emb CAY50144.1 | NADH-quinone oxidoreductase chain H [Pseudomonas fluorescens SBW25]                                         | 269  | 0.21 |
| gi 229365303 emb CAY53652.1 | DNA helicase II [Pseudomonas fluorescens SBW25]                                                             | 181  | 0.2  |
| gi 229360237 emb CAY47094.1 | dipeptide ABC transport system, substrate-binding protein [Pseudomonas fluorescens SBW25]                   | 146  | 0.2  |
| gi 229362324 emb CAY49226.1 | putative 4-hydroxyphenylpyruvate dioxygenase [Pseudomonas fluorescens SBW25]                                | 299  | 0.2  |
| gi 229365160 emb CAY53413.1 | transcriptional regulatory protein algp (alginate regulatory protein algr3) [Pseudomonas fluorescens SBW25] | 246  | 0.2  |
| gi 229362542 emb CAY49449.1 | putative non-ribosomal peptide synthetase [Pseudomonas fluorescens SBW25]                                   | 816  | 0.19 |
| gi 229362669 emb CAY49579.1 | putative amidase [Pseudomonas fluorescens SBW25]                                                            | 278  | 0.19 |
| gi 229360447 emb CAY47304.1 | iron (III) dicitrate transport protein precursor [Pseudomonas fluorescens SBW25]                            | 82   | 0.19 |
| gi 229361887 emb CAY48787.1 | conserved hypothetical protein [Pseudomonas fluorescens SBW25]                                              | 389  | 0.19 |
| gi 229360773 emb CAY47631.1 | chaperone [Pseudomonas fluorescens SBW25]                                                                   | 61   | 0.19 |
| gi 229360361 emb CAY47218.1 | cell division protein [Pseudomonas fluorescens SBW25]                                                       | 238  | 0.19 |
| gi 229362214 emb CAY49116.1 | conserved hypothetical protein [Pseudomonas fluorescens SBW25]                                              | 219  | 0.19 |
| gi 229362541 emb CAY49448.1 | putative non-ribosomal peptide synthetase [Pseudomonas fluorescens SBW25]                                   | 158  | 0.18 |
| gi 229360465 emb CAY47322.1 | GTP-binding protein [Pseudomonas fluorescens SBW25]                                                         | 90   | 0.18 |
| gi 229359480 emb CAY46321.1 | tryptophan synthase beta chain [Pseudomonas fluorescens SBW25]                                              | 240  | 0.18 |
| gi 229359945 emb CAY46799.1 | putative ATP phosphoribosyltransferase regulatory subunit [Pseudomonas fluorescens SBW25]                   | 225  | 0.18 |
| gi 229364285 emb CAY52013.1 | phosphoribosylformylglycinamide synthase [Pseudomonas fluorescens SBW25]                                    | 358  | 0.17 |
| gi 229362800 emb CAY49710.1 | aconitate hydratase B [Pseudomonas fluorescens SBW25]                                                       | 143  | 0.17 |
| gi 229359586 emb CAY46428.1 | conserved hypothetical protein [Pseudomonas fluorescens SBW25]                                              | 123  | 0.17 |
| gi 229364502 emb CAY52351.1 | protein chain initiation factor 2 [Pseudomonas fluorescens SBW25]                                           | 366  | 0.17 |
| gi 229362012 emb CAY48913.1 | putative aminopeptidase N [Pseudomonas fluorescens SBW25]                                                   | 1392 | 0.16 |
| gi 229360194 emb CAY47051.1 | chaperone [Pseudomonas fluorescens SBW25]                                                                   | 284  | 0.16 |
| gi 229364946 emb CAY53056.1 | transketolase 1 [Pseudomonas fluorescens SBW25]                                                             | 65   | 0.16 |
| gi 229360068 emb CAY46922.1 | putative short chain dehydrogenase/reductase [Pseudomonas fluorescens SBW25]                                | 283  | 0.16 |
| gi 229359492 emb CAY46333.1 | oligopeptidase A [Pseudomonas fluorescens SBW25]                                                            | 58   | 0.15 |
| gi 229360775 emb CAY47633.1 | acriflavine resistance protein B [Pseudomonas fluorescens SBW25]                                            | 1003 | 0.14 |
| gi 229363106 emb CAY50113.1 | ATP-dependent Clp protease ATP-binding subunit ClpA [Pseudomonas fluorescens SBW25]                         | 71   | 0.14 |
| gi 229363501 emb CAY50735.1 | putative glutamyl-tRNA synthetase [Pseudomonas fluorescens SBW25]                                           | 328  | 0.14 |
| gi 229363226 emb CAY50309.1 | DNA-binding ATP-dependent protease La; heat shock K-protein [Pseudomonas fluorescens SBW25]                 | 128  | 0.13 |
| gi 229363440 emb CAY50635.1 | phenylalanyl-tRNA synthetase beta chain [Pseudomonas fluorescens SBW25]                                     | 87   | 0.13 |
| gi 229360492 emb CAY47349.1 | quinoprotein glucose dehydrogenase [Pseudomonas fluorescens SBW25]                                          | 82   | 0.13 |
| gi 229362374 emb CAY49276.1 | putative methyl-accepting chemotaxis protein [Pseudomonas fluorescens SBW25]                                | 263  | 0.13 |
| gi 229360748 emb CAY47606.1 | RNA polymerase associated protein [Pseudomonas fluorescens SBW25]                                           | 148  | 0.11 |
| gi 229364426 emb CAY52231.1 | methyl-accepting chemotaxis protein II [Pseudomonas fluorescens SBW25]                                      | 259  | 0.11 |
| gi 229364514 emb CAY52369.1 | carbamoyl-phosphate synthase large chain [Pseudomonas fluorescens SBW25]                                    | 77   | 0.1  |
| gi 229359884 emb CAY46737.1 | putative glutamate-ammonia-ligase adenyltransferase [Pseudomonas fluorescens SBW25]                         | 72   | 0.1  |
| gi 229362368 emb CAY49270.1 | putative formyl transferase [Pseudomonas fluorescens SBW25]                                                 | 612  | 0.1  |
| gi 229365244 emb CAY53554.1 | putative membrane protein [Pseudomonas fluorescens SBW25]                                                   | 57   | 0.09 |
| gi 229359874 emb CAY46727.1 | bifunctional PutA protein [Pseudomonas fluorescens SBW25]                                                   | 69   | 0.08 |
| gi 229361030 emb CAY47892.1 | DNA gyrase subunit A [Pseudomonas fluorescens SBW25]                                                        | 260  | 0.08 |



|                             |                                                                                  |     |      |
|-----------------------------|----------------------------------------------------------------------------------|-----|------|
| gi 229359839 emb CAY46691.1 | glutamate synthase [NADPH] large chain precursor [Pseudomonas fluorescens SBW25] | 75  | 0.07 |
| gi 229362510 emb CAY49417.1 | putative adhesin [Pseudomonas fluorescens SBW25]                                 | 177 | 0.04 |
| gi 229362566 emb CAY49473.1 | putative adhesin [Pseudomonas fluorescens SBW25]                                 | 152 | 0.03 |

**Biofilm MV sample**

Note: Human contaminants removed.

| ID                          | Protein                                                                                             | prot_score | emPAI |
|-----------------------------|-----------------------------------------------------------------------------------------------------|------------|-------|
| gi 229363728 emb CAY51128.1 | flagellin [Pseudomonas fluorescens SBW25]                                                           | 28622      | 5.36  |
| gi 229361881 emb CAY48781.1 | ferripyoverdine receptor precursor [Pseudomonas fluorescens SBW25]                                  | 28858      | 4.75  |
| gi 229364161 emb CAY51810.1 | TolB colicin import protein [Pseudomonas fluorescens SBW25]                                         | 5548       | 4.29  |
| gi 229364712 emb CAY52676.1 | 6,7-dimethyl-8-ribityllumazine synthase [Pseudomonas fluorescens SBW25]                             | 685        | 2.57  |
| gi 229360670 emb CAY47528.1 | elongation factor [Pseudomonas fluorescens SBW25]                                                   | 663        | 2.24  |
| gi 229364221 emb CAY51907.1 | putative exported heme receptor protein [Pseudomonas fluorescens SBW25]                             | 15939      | 2.2   |
| gi 229364725 emb CAY52696.1 | putative ABC transport system, outer membrane exported protein [Pseudomonas fluorescens SBW25]      | 2128       | 2.16  |
| gi 229360345 emb CAY47202.1 | putative lipoprotein [Pseudomonas fluorescens SBW25]                                                | 5246       | 1.87  |
| gi 229360318 emb CAY47175.1 | putative lipoprotein [Pseudomonas fluorescens SBW25]                                                | 4312       | 1.8   |
| gi 229362537 emb CAY49444.1 | putative TonB-dependent outer membrane receptor [Pseudomonas fluorescens SBW25]                     | 3229       | 1.73  |
| gi 229364468 emb CAY52297.1 | ketol-acid reductoisomerase [Pseudomonas fluorescens SBW25]                                         | 1248       | 1.69  |
| gi 229359762 emb CAY46612.1 | carboxy-terminal processing protease precursor [Pseudomonas fluorescens SBW25]                      | 1905       | 1.54  |
| gi 229360012 emb CAY46866.1 | putative outer membrane protein [Pseudomonas fluorescens SBW25]                                     | 3423       | 1.51  |
| gi 229360407 emb CAY47264.1 | putative amino acid ABC transport system, substrate-binding protein [Pseudomonas fluorescens SBW25] | 2088       | 1.41  |
| gi 229360727 emb CAY47585.1 | putative membrane protein [Pseudomonas fluorescens SBW25]                                           | 684        | 1.4   |
| gi 229360636 emb CAY47494.1 | putative lipoprotein [Pseudomonas fluorescens SBW25]                                                | 3075       | 1.39  |
| gi 229364178 emb CAY51840.1 | putative family S43 non-peptidase homologue [Pseudomonas fluorescens SBW25]                         | 2487       | 1.34  |
| gi 229363881 emb CAY51363.1 | putative outer membrane porin A protein [Pseudomonas fluorescens SBW25]                             | 9019       | 1.29  |
| gi 229364240 emb CAY51939.1 | chaperone Hsp60, peptide-dependent ATPase, heat shock protein [Pseudomonas fluorescens SBW25]       | 2691       | 1.28  |
| gi 229364385 emb CAY52165.1 | putative aminotransferase [Pseudomonas fluorescens SBW25]                                           | 1289       | 1.27  |
| gi 229361136 emb CAY47999.1 | putative lipoprotein [Pseudomonas fluorescens SBW25]                                                | 561        | 1.27  |
| gi 229365095 emb CAY53304.1 | putative outer membrane protein [Pseudomonas fluorescens SBW25]                                     | 4165       | 1.24  |
| gi 229364160 emb CAY51808.1 | putative OmpA family lipoprotein [Pseudomonas fluorescens SBW25]                                    | 1561       | 1.21  |
| gi 229364173 emb CAY51832.1 | putative ferritin DPS-family DNA binding protein [Pseudomonas fluorescens SBW25]                    | 557        | 1.2   |
| gi 229359915 emb CAY46769.1 | putative lipoprotein [Pseudomonas fluorescens SBW25]                                                | 655        | 1.17  |
| gi 229359726 emb CAY46574.1 | outer membrane protein, oprE3 precursor [Pseudomonas fluorescens SBW25]                             | 3162       | 1.15  |
| gi 229364115 emb CAY51736.1 | putative exported protein [Pseudomonas fluorescens SBW25]                                           | 2894       | 1.14  |
| gi 229364029 emb CAY51593.1 | putative histidine-binding periplasmic protein precursor [Pseudomonas fluorescens SBW25]            | 330        | 1.12  |
| gi 229359677 emb CAY46525.1 | putative ABC transport system, exported protein [Pseudomonas fluorescens SBW25]                     | 930        | 1.11  |
| gi 229363756 emb CAY51170.1 | putative fatty acid transport system, membrane protein [Pseudomonas fluorescens SBW25]              | 794        | 1.02  |
| gi 229360239 emb CAY47096.1 | putative exported protein [Pseudomonas fluorescens SBW25]                                           | 334        | 1     |
| gi 229364518 emb CAY52373.1 | chaperone protein DnaK (HSP70) [Pseudomonas fluorescens SBW25]                                      | 3014       | 0.99  |
| gi 229360462 emb CAY47319.1 | cytosol aminopeptidase [Pseudomonas fluorescens SBW25]                                              | 1519       | 0.99  |
| gi 229364964 emb CAY53084.1 | putative exported protein [Pseudomonas fluorescens SBW25]                                           | 397        | 0.98  |
| gi 229360548 emb CAY47405.1 | glycerol kinase [Pseudomonas fluorescens SBW25]                                                     | 1477       | 0.92  |
| gi 229365349 emb CAY53727.1 | ATP synthase alpha chain [Pseudomonas fluorescens SBW25]                                            | 971        | 0.92  |

|                             |                                                                                                                 |      |      |
|-----------------------------|-----------------------------------------------------------------------------------------------------------------|------|------|
| gi 229363458 emb CAY50667.1 | putative L-asparaginase II precursor [Pseudomonas fluorescens SBW25]                                            | 891  | 0.91 |
| gi 229363134 emb CAY50159.1 | conserved hypothetical protein [Pseudomonas fluorescens SBW25]                                                  | 599  | 0.91 |
| gi 229362693 emb CAY49603.1 | putative ferric alcaligin siderophore receptor [Pseudomonas fluorescens SBW25]                                  | 2877 | 0.9  |
| gi 229359800 emb CAY46650.1 | glucans biosynthesis protein G precursor [Pseudomonas fluorescens SBW25]                                        | 1863 | 0.88 |
| gi 229362018 emb CAY48919.1 | putative ferric alcaligin siderophore receptor [Pseudomonas fluorescens SBW25]                                  | 1644 | 0.85 |
| gi 229361847 emb CAY48745.1 | putative TonB-receptor protein [Pseudomonas fluorescens SBW25]                                                  | 1618 | 0.83 |
| gi 229361207 emb CAY48071.1 | succinyl-CoA synthetase alpha chain [Pseudomonas fluorescens SBW25]                                             | 436  | 0.81 |
| gi 229364778 emb CAY52781.1 | 50S ribosomal protein L10 [Pseudomonas fluorescens SBW25]                                                       | 55   | 0.81 |
| gi 229364779 emb CAY52783.1 | 50S ribosomal protein L1 [Pseudomonas fluorescens SBW25]                                                        | 422  | 0.8  |
| gi 229365347 emb CAY53725.1 | ATP synthase beta chain [Pseudomonas fluorescens SBW25]                                                         | 1049 | 0.79 |
| gi 229364770 emb CAY52768.1 | 30S ribosomal protein S10 [Pseudomonas fluorescens SBW25]                                                       | 70   | 0.79 |
| gi 229364100 emb CAY51711.1 | putative porin [Pseudomonas fluorescens SBW25]                                                                  | 790  | 0.78 |
| gi 229363660 emb CAY51010.1 | diaminobutyrate--2-oxoglutarate aminotransferase [Pseudomonas fluorescens SBW25]                                | 767  | 0.78 |
| gi 229360493 emb CAY47350.1 | putative TonB-dependent receptor [Pseudomonas fluorescens SBW25]                                                | 1202 | 0.74 |
| gi 229360153 emb CAY47010.1 | putative exported protein [Pseudomonas fluorescens SBW25]                                                       | 149  | 0.74 |
| gi 229360678 emb CAY47536.1 | putative outer membrane protein [Pseudomonas fluorescens SBW25]                                                 | 117  | 0.74 |
| gi 229364606 emb CAY52504.1 | putative TonB-dependent receptor protein [Pseudomonas fluorescens SBW25]                                        | 886  | 0.71 |
| gi 229360545 emb CAY47402.1 | glutamate/aspartate ABC transport system, periplasmic binding protein precursor [Pseudomonas fluorescens SBW25] | 1311 | 0.71 |
| gi 229365228 emb CAY53529.1 | putative lipoprotein [Pseudomonas fluorescens SBW25]                                                            | 342  | 0.71 |
| gi 229361206 emb CAY48070.1 | succinyl-CoA synthetase beta chain [Pseudomonas fluorescens SBW25]                                              | 1392 | 0.68 |
| gi 229362266 emb CAY49168.1 | putative TonB-dependent receptor YncD precursor [Pseudomonas fluorescens SBW25]                                 | 1251 | 0.67 |
| gi 229359512 emb CAY46353.1 | putative D-methionine ABC transport system, substrate-binding protein [Pseudomonas fluorescens SBW25]           | 78   | 0.67 |
| gi 229360333 emb CAY47190.1 | putative exported protein [Pseudomonas fluorescens SBW25]                                                       | 123  | 0.65 |
| gi 229362520 emb CAY49427.1 | 3-oxoacyl-[acyl-carrier-protein] synthase [Pseudomonas fluorescens SBW25]                                       | 123  | 0.65 |
| gi 229360663 emb CAY47521.1 | putative lysine biosynthesis-related protein [Pseudomonas fluorescens SBW25]                                    | 113  | 0.64 |
| gi 229363451 emb CAY50654.1 | putative inosine-uridine preferring nucleoside hydrolase [Pseudomonas fluorescens SBW25]                        | 559  | 0.63 |
| gi 229360143 emb CAY47000.1 | putative ribosomal protein L25p family [Pseudomonas fluorescens SBW25]                                          | 81   | 0.63 |
| gi 229363996 emb CAY51545.1 | putative flagellar hook protein [Pseudomonas fluorescens SBW25]                                                 | 375  | 0.61 |
| gi 229364145 emb CAY51782.1 | ornithine carbamoyltransferase, catabolic [Pseudomonas fluorescens SBW25]                                       | 617  | 0.61 |
| gi 229360742 emb CAY47600.1 | branched amino acid ABC transport system, substrate-binding protein [Pseudomonas fluorescens SBW25]             | 614  | 0.57 |
| gi 229360870 emb CAY47729.1 | putative lipoprotein [Pseudomonas fluorescens SBW25]                                                            | 742  | 0.56 |
| gi 229360807 emb CAY47665.1 | probable alcohol dehydrogenase [Pseudomonas fluorescens SBW25]                                                  | 132  | 0.56 |
| gi 229359963 emb CAY46817.1 | azurin precursor [Pseudomonas fluorescens SBW25]                                                                | 142  | 0.55 |
| gi 229363585 emb CAY50877.1 | putative putative heat shock protein A [Pseudomonas fluorescens SBW25]                                          | 587  | 0.52 |
| gi 229361277 emb CAY48141.1 | putative exported protein [Pseudomonas fluorescens SBW25]                                                       | 192  | 0.51 |
| gi 229363945 emb CAY51470.1 | electron transfer flavoprotein beta-subunit [Pseudomonas fluorescens SBW25]                                     | 246  | 0.5  |
| gi 229364773 emb CAY52773.1 | 30S ribosomal protein S7 [Pseudomonas fluorescens SBW25]                                                        | 62   | 0.49 |
| gi 229365027 emb CAY53190.1 | phosphopantetheine adenyllyltransferase [Pseudomonas fluorescens SBW25]                                         | 68   | 0.48 |
| gi 229364498 emb CAY52345.1 | polynucleotide phosphorylase/polyadenylase [Pseudomonas fluorescens SBW25]                                      | 264  | 0.47 |
| gi 229363775 emb CAY51194.1 | conserved hypothetical protein [Pseudomonas fluorescens SBW25]                                                  | 587  | 0.47 |

|                             |                                                                                            |     |      |
|-----------------------------|--------------------------------------------------------------------------------------------|-----|------|
| gi 229360168 emb CAY47025.1 | putative TonB-dependent exported protein [Pseudomonas fluorescens SBW25]                   | 403 | 0.46 |
| gi 229359725 emb CAY46573.1 | purative iron-transport related exported protein [Pseudomonas fluorescens SBW25]           | 346 | 0.46 |
| gi 229364941 emb CAY53048.1 | fructose-bisphosphate aldolase [Pseudomonas fluorescens SBW25]                             | 89  | 0.45 |
| gi 229360326 emb CAY47183.1 | putative exported peptidase [Pseudomonas fluorescens SBW25]                                | 273 | 0.44 |
| gi 229364754 emb CAY52740.1 | 50S ribosomal protein L6 [Pseudomonas fluorescens SBW25]                                   | 73  | 0.44 |
| gi 229360235 emb CAY47092.1 | putative outer membrane porin [Pseudomonas fluorescens SBW25]                              | 890 | 0.43 |
| gi 229360863 emb CAY47722.1 | putative exported heat-shock adaptation serine protease [Pseudomonas fluorescens SBW25]    | 974 | 0.43 |
| gi 229361513 emb CAY48389.1 | putative acetyl-CoA transferase [Pseudomonas fluorescens SBW25]                            | 473 | 0.43 |
| gi 229359803 emb CAY46653.1 | putative ABC transport system, exported protein [Pseudomonas fluorescens SBW25]            | 174 | 0.43 |
| gi 229361985 emb CAY48885.1 | conserved hypothetical protein [Pseudomonas fluorescens SBW25]                             | 121 | 0.43 |
| gi 229362669 emb CAY49579.1 | putative amidase [Pseudomonas fluorescens SBW25]                                           | 992 | 0.42 |
| gi 229364304 emb CAY52041.1 | conserved hypothetical protein [Pseudomonas fluorescens SBW25]                             | 224 | 0.42 |
| gi 229364817 emb CAY52842.1 | putative exported organic solvent tolerance protein [Pseudomonas fluorescens SBW25]        | 203 | 0.41 |
| gi 229360534 emb CAY47391.1 | putative aminotransferase [Pseudomonas fluorescens SBW25]                                  | 663 | 0.41 |
| gi 229362312 emb CAY49214.1 | UTP--glucose-1-phosphate uridylyltransferase [Pseudomonas fluorescens SBW25]               | 220 | 0.41 |
| gi 229364757 emb CAY52745.1 | 50S ribosomal protein L5 [Pseudomonas fluorescens SBW25]                                   | 123 | 0.41 |
| gi 229360341 emb CAY47198.1 | putative phospholipid-binding lipoprotein [Pseudomonas fluorescens SBW25]                  | 64  | 0.41 |
| gi 229362316 emb CAY49218.1 | alkyl hydroperoxide reductase protein [Pseudomonas fluorescens SBW25]                      | 41  | 0.41 |
| gi 229360147 emb CAY47004.1 | conserved hypothetical protein [Pseudomonas fluorescens SBW25]                             | 399 | 0.4  |
| gi 229361408 emb CAY48283.1 | putative ABC transport system, substrate-binding protein [Pseudomonas fluorescens SBW25]   | 68  | 0.4  |
| gi 229364519 emb CAY52374.1 | protein GrpE (HSP-70 cofactor) [Pseudomonas fluorescens SBW25]                             | 239 | 0.4  |
| gi 229363896 emb CAY51390.1 | 2-methylcitrate dehydratase [Pseudomonas fluorescens SBW25]                                | 276 | 0.39 |
| gi 229363478 emb CAY50697.1 | O-succinylhomoserine sulphydrylase [Pseudomonas fluorescens SBW25]                         | 168 | 0.39 |
| gi 229361099 emb CAY47962.1 | putative elongation factor [Pseudomonas fluorescens SBW25]                                 | 110 | 0.39 |
| gi 229365237 emb CAY53542.1 | conserved hypothetical protein [Pseudomonas fluorescens SBW25]                             | 287 | 0.38 |
| gi 229360557 emb CAY47414.1 | putative alkyl hydroperoxide reductase [Pseudomonas fluorescens SBW25]                     | 320 | 0.38 |
| gi 229362957 emb CAY49887.1 | putative peptidase [Pseudomonas fluorescens SBW25]                                         | 133 | 0.37 |
| gi 229362643 emb CAY49551.1 | putative rhizopine biosynthesis/dihydropicolinate synthase [Pseudomonas fluorescens SBW25] | 76  | 0.37 |
| gi 229364769 emb CAY52766.1 | 50S ribosomal protein L3 [Pseudomonas fluorescens SBW25]                                   | 89  | 0.37 |
| gi 229363655 emb CAY51001.1 | putative aspartyl aminopeptidase [Pseudomonas fluorescens SBW25]                           | 132 | 0.36 |
| gi 229360146 emb CAY47003.1 | putative outer-membrane lipoprotein [Pseudomonas fluorescens SBW25]                        | 336 | 0.36 |
| gi 229360305 emb CAY47162.1 | ATP phosphoribosyltransferase [Pseudomonas fluorescens SBW25]                              | 39  | 0.36 |
| gi 229361213 emb CAY48077.1 | chaperone (heat shock protein) [Pseudomonas fluorescens SBW25]                             | 124 | 0.35 |
| gi 229364248 emb CAY51953.1 | putative lipoprotein [Pseudomonas fluorescens SBW25]                                       | 307 | 0.35 |
| gi 229364492 emb CAY52336.1 | glucose-6-phosphate isomerase [Pseudomonas fluorescens SBW25]                              | 225 | 0.34 |
| gi 229360284 emb CAY47141.1 | fumarate hydratase class II [Pseudomonas fluorescens SBW25]                                | 581 | 0.34 |
| gi 229364818 emb CAY52844.1 | putative chaperone [Pseudomonas fluorescens SBW25]                                         | 347 | 0.34 |
| gi 229364744 emb CAY52723.1 | DNA-directed RNA polymerase alpha chain [Pseudomonas fluorescens SBW25]                    | 195 | 0.34 |
| gi 229364790 emb CAY52800.1 | N-acetyl-gamma-glutamyl-phosphate reductase [Pseudomonas fluorescens SBW25]                | 101 | 0.34 |
| gi 229359606 emb CAY46448.1 | putative lipoprotein [Pseudomonas fluorescens SBW25]                                       | 53  | 0.34 |

|                             |                                                                                                                           |     |      |
|-----------------------------|---------------------------------------------------------------------------------------------------------------------------|-----|------|
| gi 229360942 emb CAY47802.1 | fatty oxidation complex alpha subunit [Pseudomonas fluorescens SBW25]                                                     | 126 | 0.33 |
| gi 229361205 emb CAY48069.1 | dihydrolipoyl dehydrogenase [Pseudomonas fluorescens SBW25]                                                               | 173 | 0.33 |
| gi 229364959 emb CAY53075.1 | adenosylhomocysteinase [Pseudomonas fluorescens SBW25]                                                                    | 110 | 0.33 |
| gi 229360191 emb CAY47048.1 | putative lipoprotein [Pseudomonas fluorescens SBW25]                                                                      | 478 | 0.32 |
| gi 229363973 emb CAY51508.1 | 3-oxoacyl-[acyl-carrier protein] reductase [Pseudomonas fluorescens SBW25]                                                | 54  | 0.32 |
| gi 229365019 emb CAY53178.1 | conserved hypothetical protein [Pseudomonas fluorescens SBW25]                                                            | 293 | 0.31 |
| gi 229359912 emb CAY46766.1 | putative outer membrane protein [Pseudomonas fluorescens SBW25]                                                           | 136 | 0.31 |
| gi 229363297 emb CAY50405.1 | putative exported protein [Pseudomonas fluorescens SBW25]                                                                 | 113 | 0.31 |
| gi 229365081 emb CAY53280.1 | putrescine ABC transport system, substrate-binding periplasmic protein precursor [Pseudomonas fluorescens SBW25]          | 374 | 0.31 |
| gi 229363220 emb CAY50301.1 | putative lipoprotein [Pseudomonas fluorescens SBW25]                                                                      | 434 | 0.3  |
| gi 229359974 emb CAY46828.1 | putative amino acid oxidase [Pseudomonas fluorescens SBW25]                                                               | 401 | 0.3  |
| gi 229360709 emb CAY47567.1 | putative amino acid transport system, substrate-binding protein [Pseudomonas fluorescens SBW25]                           | 64  | 0.3  |
| gi 229359882 emb CAY46735.1 | dihydrolipoyllysine-residue acetyltransferase component of pyruvate dehydrogenase complex [Pseudomonas fluorescens SBW25] | 382 | 0.29 |
| gi 229362357 emb CAY49259.1 | putative phenylacetic acid degradation enoyl-CoA hydratase [Pseudomonas fluorescens SBW25]                                | 215 | 0.29 |
| gi 229359741 emb CAY46590.1 | putative amino acid ABC transport system, membrane protein [Pseudomonas fluorescens SBW25]                                | 81  | 0.29 |
| gi 229364150 emb CAY51790.1 | glycine dehydrogenase [decarboxylating] [Pseudomonas fluorescens SBW25]                                                   | 550 | 0.28 |
| gi 229360677 emb CAY47535.1 | putative surface exported protein [Pseudomonas fluorescens SBW25]                                                         | 573 | 0.28 |
| gi 229364771 emb CAY52770.1 | elongation factor TU [Pseudomonas fluorescens SBW25]                                                                      | 533 | 0.28 |
| gi 229363503 emb CAY50737.1 | aromatic-amino-acid aminotransferase [Pseudomonas fluorescens SBW25]                                                      | 177 | 0.28 |
| gi 229364159 emb CAY51806.1 | putative exported protein [Pseudomonas fluorescens SBW25]                                                                 | 373 | 0.28 |
| gi 229359623 emb CAY46465.1 | 4-aminobutyrate aminotransferase [Pseudomonas fluorescens SBW25]                                                          | 202 | 0.27 |
| gi 229364672 emb CAY52606.1 | gamma-glutamyl phosphate reductase [Pseudomonas fluorescens SBW25]                                                        | 98  | 0.27 |
| gi 229364012 emb CAY51568.1 | aspartokinase [Pseudomonas fluorescens SBW25]                                                                             | 86  | 0.27 |
| gi 229364766 emb CAY52761.1 | 50S ribosomal protein L2 [Pseudomonas fluorescens SBW25]                                                                  | 160 | 0.27 |
| gi 229361927 emb CAY48827.1 | putative TonB-dependent receptor [Pseudomonas fluorescens SBW25]                                                          | 309 | 0.26 |
| gi 229364772 emb CAY52772.1 | elongation factor G [Pseudomonas fluorescens SBW25]                                                                       | 249 | 0.26 |
| gi 229361242 emb CAY48106.1 | putative dipeptidase [Pseudomonas fluorescens SBW25]                                                                      | 72  | 0.26 |
| gi 229359883 emb CAY46736.1 | pyruvate dehydrogenase E1 component [Pseudomonas fluorescens SBW25]                                                       | 571 | 0.25 |
| gi 229365298 emb CAY53646.1 | oxaloacetate decarboxylase alpha chain [Pseudomonas fluorescens SBW25]                                                    | 87  | 0.25 |
| gi 229364659 emb CAY52587.1 | putative lipoprotein [Pseudomonas fluorescens SBW25]                                                                      | 108 | 0.25 |
| gi 229363229 emb CAY50312.1 | trigger factor [Pseudomonas fluorescens SBW25]                                                                            | 104 | 0.25 |
| gi 229365218 emb CAY53512.1 | acetylglutamate kinase [Pseudomonas fluorescens SBW25]                                                                    | 110 | 0.25 |
| gi 229360447 emb CAY47304.1 | iron (III) dicitrate transport protein precursor [Pseudomonas fluorescens SBW25]                                          | 298 | 0.24 |
| gi 229365018 emb CAY53176.1 | putative peptidase [Pseudomonas fluorescens SBW25]                                                                        | 112 | 0.24 |
| gi 229365217 emb CAY53511.1 | putative phosphomannomutase/phosphoglucomutase [Pseudomonas fluorescens SBW25]                                            | 67  | 0.24 |
| gi 229363114 emb CAY50127.1 | adenylosuccinate lyase [Pseudomonas fluorescens SBW25]                                                                    | 59  | 0.24 |
| gi 229361917 emb CAY48817.1 | putative rhizopine-binding ABC transporter protein [Pseudomonas fluorescens SBW25]                                        | 127 | 0.24 |
| gi 229363457 emb CAY50665.1 | putative ribose transport system, substrate-binding protein [Pseudomonas fluorescens SBW25]                               | 101 | 0.24 |
| gi 229361086 emb CAY47949.1 | conserved hypothetical exported protein [Pseudomonas fluorescens SBW25]                                                   | 85  | 0.24 |
| gi 229363482 emb CAY50703.1 | acetyl CoA carboxylase, carboxyltransferase subunit beta [Pseudomonas fluorescens SBW25]                                  | 64  | 0.24 |

|                             |                                                                                                              |     |      |
|-----------------------------|--------------------------------------------------------------------------------------------------------------|-----|------|
| gi 229363888 emb CAY51376.1 | putative phosphoenolpyruvate synthase [Pseudomonas fluorescens SBW25]                                        | 294 | 0.23 |
| gi 229359775 emb CAY46625.1 | glutamine synthetase [Pseudomonas fluorescens SBW25]                                                         | 404 | 0.23 |
| gi 229365169 emb CAY53427.1 | argininosuccinate lyase [Pseudomonas fluorescens SBW25]                                                      | 85  | 0.23 |
| gi 229364422 emb CAY52224.1 | octaprenyl-diphosphate synthase [Pseudomonas fluorescens SBW25]                                              | 42  | 0.23 |
| gi 229362368 emb CAY49270.1 | putative formyl transferase [Pseudomonas fluorescens SBW25]                                                  | 220 | 0.22 |
| gi 229364218 emb CAY51902.1 | glyceraldehyde 3-phosphate dehydrogenase 1 [Pseudomonas fluorescens SBW25]                                   | 160 | 0.22 |
| gi 229364995 emb CAY53133.1 | aspartate carbamoyltransferase [Pseudomonas fluorescens SBW25]                                               | 62  | 0.22 |
| gi 229361717 emb CAY48598.1 | putative TonB-dependent siderophore receptor [Pseudomonas fluorescens SBW25]                                 | 80  | 0.2  |
| gi 229364293 emb CAY52028.1 | GMP synthase (glutamine-hydrolyzing) [Pseudomonas fluorescens SBW25]                                         | 81  | 0.2  |
| gi 229360610 emb CAY47467.1 | glucans biosynthesis protein D precursor [Pseudomonas fluorescens SBW25]                                     | 68  | 0.2  |
| gi 229359969 emb CAY46823.1 | putative branched amino acid ABC transport system, substrate-binding protein [Pseudomonas fluorescens SBW25] | 232 | 0.2  |
| gi 229363488 emb CAY50712.1 | putative 3-isopropylmalate dehydrogenase [Pseudomonas fluorescens SBW25]                                     | 79  | 0.2  |
| gi 229365160 emb CAY53413.1 | transcriptional regulatory protein algp (alginate regulatory protein algr3) [Pseudomonas fluorescens SBW25]  | 72  | 0.2  |
| gi 229364152 emb CAY51794.1 | putative aminomethyltransferase (glycine cleavage system T protein) [Pseudomonas fluorescens SBW25]          | 54  | 0.2  |
| gi 229360794 emb CAY47652.1 | periplasmic beta-glucosidase precursor [Pseudomonas fluorescens SBW25]                                       | 122 | 0.19 |
| gi 229362548 emb CAY49455.1 | putative secreted pectate lyase [Pseudomonas fluorescens SBW25]                                              | 544 | 0.19 |
| gi 229360943 emb CAY47803.1 | 3-ketoacyl-CoA thiolase [Pseudomonas fluorescens SBW25]                                                      | 162 | 0.19 |
| gi 229364300 emb CAY52035.1 | 2-isopropylmalate synthase [Pseudomonas fluorescens SBW25]                                                   | 126 | 0.19 |
| gi 229363487 emb CAY50710.1 | aspartate-semialdehyde dehydrogenase [Pseudomonas fluorescens SBW25]                                         | 93  | 0.19 |
| gi 229362518 emb CAY49425.1 | 3-oxoacyl-[acyl-carrier-protein] synthase II [Pseudomonas fluorescens SBW25]                                 | 77  | 0.19 |
| gi 229362358 emb CAY49260.1 | acyl-CoA dehydrogenase [Pseudomonas fluorescens SBW25]                                                       | 64  | 0.19 |
| gi 229359476 emb CAY46317.1 | galactonate dehydratase [Pseudomonas fluorescens SBW25]                                                      | 64  | 0.19 |
| gi 229364515 emb CAY52370.1 | carbamoyl-phosphate synthase small chain [Pseudomonas fluorescens SBW25]                                     | 63  | 0.19 |
| gi 229364664 emb CAY52594.1 | putative cell division-related protein [Pseudomonas fluorescens SBW25]                                       | 53  | 0.19 |
| gi 229364775 emb CAY52776.1 | DNA-directed RNA polymerase beta~ chain [Pseudomonas fluorescens SBW25]                                      | 310 | 0.18 |
| gi 229360332 emb CAY47189.1 | conserved hypothetical protein [Pseudomonas fluorescens SBW25]                                               | 250 | 0.18 |
| gi 229364996 emb CAY53136.1 | dihydroorotase-like protein [Pseudomonas fluorescens SBW25]                                                  | 90  | 0.18 |
| gi 229363188 emb CAY50246.1 | putative acyl-CoA dehydrogenase [Pseudomonas fluorescens SBW25]                                              | 65  | 0.18 |
| gi 229363731 emb CAY51133.1 | putative flagellar hook-associated protein [Pseudomonas fluorescens SBW25]                                   | 79  | 0.17 |
| gi 229359832 emb CAY46682.1 | putative NADP-dependent malic enzyme [Pseudomonas fluorescens SBW25]                                         | 228 | 0.17 |
| gi 229363109 emb CAY50118.1 | isocitrate dehydrogenase [NADP] [Pseudomonas fluorescens SBW25]                                              | 144 | 0.17 |
| gi 229360689 emb CAY47547.1 | enolase [Pseudomonas fluorescens SBW25]                                                                      | 81  | 0.17 |
| gi 229359946 emb CAY46800.1 | adenylosuccinate synthetase [Pseudomonas fluorescens SBW25]                                                  | 63  | 0.17 |
| gi 229362026 emb CAY48927.1 | putative exported protein [Pseudomonas fluorescens SBW25]                                                    | 60  | 0.17 |
| gi 229359825 emb CAY46675.1 | ATP-dependent hsl protease ATP-binding subunit [Pseudomonas fluorescens SBW25]                               | 46  | 0.16 |
| gi 229359622 emb CAY46464.1 | succinate-semialdehyde dehydrogenase [NADP+] [Pseudomonas fluorescens SBW25]                                 | 101 | 0.15 |
| gi 229362514 emb CAY49421.1 | putative FAD-binding oxidase [Pseudomonas fluorescens SBW25]                                                 | 96  | 0.15 |
| gi 229365209 emb CAY53495.1 | putative aldehyde dehydrogenase [Pseudomonas fluorescens SBW25]                                              | 71  | 0.15 |
| gi 229364202 emb CAY51876.1 | pyruvate kinase [Pseudomonas fluorescens SBW25]                                                              | 51  | 0.15 |
| gi 229365064 emb CAY53252.1 | putative oxidase [Pseudomonas fluorescens SBW25]                                                             | 48  | 0.15 |

|                             |                                                                                                  |     |      |
|-----------------------------|--------------------------------------------------------------------------------------------------|-----|------|
| gi 229361024 emb CAY47886.1 | putative peptide ABC transport system, substrate-binding protein [Pseudomonas fluorescens SBW25] | 51  | 0.14 |
| gi 229362022 emb CAY48923.1 | glucose-6-phosphate 1-dehydrogenase [Pseudomonas fluorescens SBW25]                              | 33  | 0.14 |
| gi 229364870 emb CAY52932.1 | putative TonB-dependent membrane protein [Pseudomonas fluorescens SBW25]                         | 265 | 0.13 |
| gi 229364502 emb CAY52351.1 | protein chain initiation factor 2 [Pseudomonas fluorescens SBW25]                                | 92  | 0.13 |
| gi 229359586 emb CAY46428.1 | conserved hypothetical protein [Pseudomonas fluorescens SBW25]                                   | 70  | 0.13 |
| gi 229363226 emb CAY50309.1 | DNA-binding ATP-dependent protease La; heat shock K-protein [Pseudomonas fluorescens SBW25]      | 59  | 0.13 |
| gi 229360237 emb CAY47094.1 | dipeptide ABC transport system, substrate-binding protein [Pseudomonas fluorescens SBW25]        | 85  | 0.13 |
| gi 229365213 emb CAY53502.1 | putative transport-related, exported protein [Pseudomonas fluorescens SBW25]                     | 56  | 0.13 |
| gi 229361201 emb CAY48065.1 | succinate dehydrogenase flavoprotein subunit [Pseudomonas fluorescens SBW25]                     | 143 | 0.12 |
| gi 229360121 emb CAY46975.1 | putative lipoprotein [Pseudomonas fluorescens SBW25]                                             | 113 | 0.12 |
| gi 229361036 emb CAY47898.1 | 30S ribosomal protein S1 [Pseudomonas fluorescens SBW25]                                         | 57  | 0.12 |
| gi 229361427 emb CAY48302.1 | putative peptidase [Pseudomonas fluorescens SBW25]                                               | 44  | 0.12 |
| gi 229359828 emb CAY46678.1 | arginyl-tRNA synthetase [Pseudomonas fluorescens SBW25]                                          | 40  | 0.12 |
| gi 229365033 emb CAY53201.1 | dihydroxy-acid dehydratase [Pseudomonas fluorescens SBW25]                                       | 35  | 0.12 |
| gi 229359777 emb CAY46627.1 | putative elongation factor/GTP-binding protein TypA/BipA [Pseudomonas fluorescens SBW25]         | 63  | 0.11 |
| gi 229363982 emb CAY51521.1 | putative ribonuclease E [Pseudomonas fluorescens SBW25]                                          | 85  | 0.1  |
| gi 229359492 emb CAY46333.1 | oligopeptidase A [Pseudomonas fluorescens SBW25]                                                 | 61  | 0.1  |
| gi 229359576 emb CAY46418.1 | putative exported protein [Pseudomonas fluorescens SBW25]                                        | 44  | 0.1  |
| gi 229363110 emb CAY50120.1 | isocitrate dehydrogenase [NADP] [Pseudomonas fluorescens SBW25]                                  | 81  | 0.09 |
| gi 229360429 emb CAY47286.1 | putative ferric siderophore receptor [Pseudomonas fluorescens SBW25]                             | 59  | 0.09 |
| gi 229361030 emb CAY47892.1 | DNA gyrase subunit A [Pseudomonas fluorescens SBW25]                                             | 55  | 0.08 |
| gi 229362800 emb CAY49710.1 | aconitate hydratase B [Pseudomonas fluorescens SBW25]                                            | 41  | 0.08 |
| gi 229364776 emb CAY52777.1 | DNA-directed RNA polymerase beta chain [Pseudomonas fluorescens SBW25]                           | 82  | 0.05 |
| gi 229364285 emb CAY52013.1 | phosphoribosylformylglycinamide synthase [Pseudomonas fluorescens SBW25]                         | 74  | 0.05 |
| gi 229362815 emb CAY49725.1 | conserved hypothetical protein [Pseudomonas fluorescens SBW25]                                   | 305 | 0.04 |
| gi 229359591 emb CAY46433.1 | putative adhesin [Pseudomonas fluorescens SBW25]                                                 | 34  | 0.03 |

## Plankton MV sample

Note: Human contaminants removed.

| ID                          | Protein                                                                                        | prot_score | emPAI |
|-----------------------------|------------------------------------------------------------------------------------------------|------------|-------|
| gi 229364773 emb CAY52773.1 | 30S ribosomal protein S7 [Pseudomonas fluorescens SBW25]                                       | 1211       | 2.28  |
| gi 229364161 emb CAY51810.1 | TolB colicin import protein [Pseudomonas fluorescens SBW25]                                    | 2081       | 1.89  |
| gi 229364145 emb CAY51782.1 | ornithine carbamoyltransferase, catabolic [Pseudomonas fluorescens SBW25]                      | 969        | 1.83  |
| gi 229364240 emb CAY51939.1 | chaperone Hsp60, peptide-dependent ATPase, heat shock protein [Pseudomonas fluorescens SBW25]  | 3493       | 1.76  |
| gi 229361881 emb CAY48781.1 | ferripyoverdine receptor precursor [Pseudomonas fluorescens SBW25]                             | 3600       | 1.55  |
| gi 229364221 emb CAY51907.1 | putative exported heme receptor protein [Pseudomonas fluorescens SBW25]                        | 5245       | 1.54  |
| gi 229362537 emb CAY49444.1 | putative TonB-dependent outer membrane receptor [Pseudomonas fluorescens SBW25]                | 1806       | 1.36  |
| gi 229363728 emb CAY51128.1 | flagellin [Pseudomonas fluorescens SBW25]                                                      | 2980       | 1.26  |
| gi 229359762 emb CAY46612.1 | carboxy-terminal processing protease precursor [Pseudomonas fluorescens SBW25]                 | 1205       | 1.17  |
| gi 229365095 emb CAY53304.1 | putative outer membrane protein [Pseudomonas fluorescens SBW25]                                | 2262       | 1.08  |
| gi 229360012 emb CAY46866.1 | putative outer membrane protein [Pseudomonas fluorescens SBW25]                                | 1036       | 1.07  |
| gi 229364725 emb CAY52696.1 | putative ABC transport system, outer membrane exported protein [Pseudomonas fluorescens SBW25] | 1158       | 1.05  |
| gi 229361206 emb CAY48070.1 | succinyl-CoA synthetase beta chain [Pseudomonas fluorescens SBW25]                             | 1119       | 1     |
| gi 229364744 emb CAY52723.1 | DNA-directed RNA polymerase alpha chain [Pseudomonas fluorescens SBW25]                        | 1117       | 0.98  |
| gi 229365349 emb CAY53727.1 | ATP synthase alpha chain [Pseudomonas fluorescens SBW25]                                       | 813        | 0.92  |
| gi 229364775 emb CAY52776.1 | DNA-directed RNA polymerase beta~ chain [Pseudomonas fluorescens SBW25]                        | 3251       | 0.89  |
| gi 229360807 emb CAY47665.1 | probable alcohol dehydrogenase [Pseudomonas fluorescens SBW25]                                 | 414        | 0.87  |
| gi 229359883 emb CAY46736.1 | pyruvate dehydrogenase E1 component [Pseudomonas fluorescens SBW25]                            | 1453       | 0.86  |
| gi 229360345 emb CAY47202.1 | putative lipoprotein [Pseudomonas fluorescens SBW25]                                           | 1528       | 0.84  |
| gi 229361207 emb CAY48071.1 | succinyl-CoA synthetase alpha chain [Pseudomonas fluorescens SBW25]                            | 199        | 0.81  |
| gi 229364173 emb CAY51832.1 | putative ferritin DPS-family DNA binding protein [Pseudomonas fluorescens SBW25]               | 471        | 0.81  |
| gi 229364764 emb CAY52758.1 | 50S ribosomal protein L22 [Pseudomonas fluorescens SBW25]                                      | 666        | 0.78  |
| gi 229360239 emb CAY47096.1 | putative exported protein [Pseudomonas fluorescens SBW25]                                      | 171        | 0.74  |
| gi 229364385 emb CAY52165.1 | putative aminotransferase [Pseudomonas fluorescens SBW25]                                      | 353        | 0.73  |
| gi 229364776 emb CAY52777.1 | DNA-directed RNA polymerase beta chain [Pseudomonas fluorescens SBW25]                         | 1084       | 0.7   |
| gi 229364115 emb CAY51736.1 | putative exported protein [Pseudomonas fluorescens SBW25]                                      | 1362       | 0.7   |
| gi 229363442 emb CAY50639.1 | 50S ribosomal protein L20 [Pseudomonas fluorescens SBW25]                                      | 79         | 0.68  |
| gi 229364757 emb CAY52745.1 | 50S ribosomal protein L5 [Pseudomonas fluorescens SBW25]                                       | 446        | 0.67  |
| gi 229360318 emb CAY47175.1 | putative lipoprotein [Pseudomonas fluorescens SBW25]                                           | 308        | 0.67  |
| gi 229365347 emb CAY53725.1 | ATP synthase beta chain [Pseudomonas fluorescens SBW25]                                        | 258        | 0.66  |
| gi 229360143 emb CAY47000.1 | putative ribosomal protein L25p family [Pseudomonas fluorescens SBW25]                         | 80         | 0.63  |
| gi 229362326 emb CAY49228.1 | putative aldo/keto reductase [Pseudomonas fluorescens SBW25]                                   | 281        | 0.62  |
| gi 229360557 emb CAY47414.1 | putative alkyl hydroperoxide reductase [Pseudomonas fluorescens SBW25]                         | 130        | 0.62  |
| gi 229364743 emb CAY52721.1 | 50S ribosomal protein L17 [Pseudomonas fluorescens SBW25]                                      | 83         | 0.62  |
| gi 229363458 emb CAY50667.1 | putative L-asparaginase II precursor [Pseudomonas fluorescens SBW25]                           | 273        | 0.59  |
| gi 229359800 emb CAY46650.1 | glucans biosynthesis protein G precursor [Pseudomonas fluorescens SBW25]                       | 310        | 0.58  |
| gi 229360548 emb CAY47405.1 | glycerol kinase [Pseudomonas fluorescens SBW25]                                                | 1309       | 0.58  |



|                             |                                                                                                                                   |      |      |
|-----------------------------|-----------------------------------------------------------------------------------------------------------------------------------|------|------|
| gi 229359726 emb CAY46574.1 | outer membrane protein, oprE3 precursor [Pseudomonas fluorescens SBW25]                                                           | 795  | 0.58 |
| gi 229359882 emb CAY46735.1 | dihydrolipoyllysine-residue acetyltransferase component of pyruvate dehydrogenase complex [Pseudomonas fluorescens SBW25]         | 962  | 0.57 |
| gi 111111137 gb EWC11137.1  | 47132620_keratin_2_Homo_sapiens [contaminants]                                                                                    | 1225 | 0.56 |
| gi 229362018 emb CAY48919.1 | putative ferric alcaligin siderophore receptor [Pseudomonas fluorescens SBW25]                                                    | 437  | 0.55 |
| gi 229361204 emb CAY48068.1 | dihydrolipoyllysine-residue succinyltransferase component of 2-oxoglutarate dehydrogenase complex [Pseudomonas fluorescens SBW25] | 666  | 0.53 |
| gi 229364712 emb CAY52676.1 | 6,7-dimethyl-8-ribityllumazine synthase [Pseudomonas fluorescens SBW25]                                                           | 405  | 0.53 |
| gi 229361847 emb CAY48745.1 | putative TonB-receptor protein [Pseudomonas fluorescens SBW25]                                                                    | 1014 | 0.52 |
| gi 229363503 emb CAY50737.1 | aromatic-amino-acid aminotransferase [Pseudomonas fluorescens SBW25]                                                              | 193  | 0.52 |
| gi 229363585 emb CAY50877.1 | putative putative heat shock protein A [Pseudomonas fluorescens SBW25]                                                            | 640  | 0.52 |
| gi 229363881 emb CAY51363.1 | putative outer membrane porin A protein [Pseudomonas fluorescens SBW25]                                                           | 910  | 0.51 |
| gi 229360663 emb CAY47521.1 | putative lysine biosynthesis-related protein [Pseudomonas fluorescens SBW25]                                                      | 216  | 0.49 |
| gi 229364778 emb CAY52781.1 | 50S ribosomal protein L10 [Pseudomonas fluorescens SBW25]                                                                         | 180  | 0.49 |
| gi 229360407 emb CAY47264.1 | putative amino acid ABC transport system, substrate-binding protein [Pseudomonas fluorescens SBW25]                               | 204  | 0.48 |
| gi 229363134 emb CAY50159.1 | conserved hypothetical protein [Pseudomonas fluorescens SBW25]                                                                    | 79   | 0.48 |
| gi 229359915 emb CAY46769.1 | putative lipoprotein [Pseudomonas fluorescens SBW25]                                                                              | 104  | 0.47 |
| gi 229361044 emb CAY47906.1 | polysaccharide biosynthesis protein [Pseudomonas fluorescens SBW25]                                                               | 250  | 0.45 |
| gi 229360636 emb CAY47494.1 | putative lipoprotein [Pseudomonas fluorescens SBW25]                                                                              | 278  | 0.45 |
| gi 229360153 emb CAY47010.1 | putative exported protein [Pseudomonas fluorescens SBW25]                                                                         | 68   | 0.45 |
| gi 229363110 emb CAY50120.1 | isocitrate dehydrogenase [NADP] [Pseudomonas fluorescens SBW25]                                                                   | 792  | 0.44 |
| gi 229363660 emb CAY51010.1 | diaminobutyrate--2-oxoglutarate aminotransferase [Pseudomonas fluorescens SBW25]                                                  | 505  | 0.43 |
| gi 229360235 emb CAY47092.1 | putative outer membrane porin [Pseudomonas fluorescens SBW25]                                                                     | 418  | 0.43 |
| gi 229365217 emb CAY53511.1 | putative phosphomannomutase/phosphoglucosyltransferase [Pseudomonas fluorescens SBW25]                                            | 694  | 0.43 |
| gi 229364304 emb CAY52041.1 | conserved hypothetical protein [Pseudomonas fluorescens SBW25]                                                                    | 218  | 0.42 |
| gi 229360670 emb CAY47528.1 | elongation factor [Pseudomonas fluorescens SBW25]                                                                                 | 71   | 0.42 |
| gi 229360462 emb CAY47319.1 | cytosol aminopeptidase [Pseudomonas fluorescens SBW25]                                                                            | 661  | 0.41 |
| gi 229360341 emb CAY47198.1 | putative phospholipid-binding lipoprotein [Pseudomonas fluorescens SBW25]                                                         | 183  | 0.41 |
| gi 229362316 emb CAY49218.1 | alkyl hydroperoxide reductase protein [Pseudomonas fluorescens SBW25]                                                             | 93   | 0.41 |
| gi 229364498 emb CAY52345.1 | polynucleotide phosphorylase/polyadenylase [Pseudomonas fluorescens SBW25]                                                        | 512  | 0.4  |
| gi 229365218 emb CAY53512.1 | acetylglutamate kinase [Pseudomonas fluorescens SBW25]                                                                            | 130  | 0.4  |
| gi 229362266 emb CAY49168.1 | putative TonB-dependent receptor YncD precursor [Pseudomonas fluorescens SBW25]                                                   | 813  | 0.39 |
| gi 229359623 emb CAY46465.1 | 4-aminobutyrate aminotransferase [Pseudomonas fluorescens SBW25]                                                                  | 162  | 0.38 |
| gi 229364518 emb CAY52373.1 | chaperone protein DnaK (HSP70) [Pseudomonas fluorescens SBW25]                                                                    | 396  | 0.37 |
| gi 229363109 emb CAY50118.1 | isocitrate dehydrogenase [NADP] [Pseudomonas fluorescens SBW25]                                                                   | 584  | 0.37 |
| gi 229360144 emb CAY47001.1 | ribose-phosphate pyrophosphokinase [Pseudomonas fluorescens SBW25]                                                                | 117  | 0.37 |
| gi 229364178 emb CAY51840.1 | putative family S43 non-peptidase homologue [Pseudomonas fluorescens SBW25]                                                       | 645  | 0.36 |
| gi 229359946 emb CAY46800.1 | adenylosuccinate synthetase [Pseudomonas fluorescens SBW25]                                                                       | 157  | 0.36 |
| gi 229360640 emb CAY47498.1 | adenylate kinase [Pseudomonas fluorescens SBW25]                                                                                  | 56   | 0.36 |
| gi 229360146 emb CAY47003.1 | putative outer-membrane lipoprotein [Pseudomonas fluorescens SBW25]                                                               | 318  | 0.36 |
| gi 229359527 emb CAY46368.1 | thiol:disulfide interchange protein [Pseudomonas fluorescens SBW25]                                                               | 59   | 0.36 |
| gi 229360305 emb CAY47162.1 | ATP phosphoribosyltransferase [Pseudomonas fluorescens SBW25]                                                                     | 47   | 0.36 |

|                             |                                                                                                     |     |      |
|-----------------------------|-----------------------------------------------------------------------------------------------------|-----|------|
| gi 229364468 emb CAY52297.1 | ketol-acid reductoisomerase [Pseudomonas fluorescens SBW25]                                         | 252 | 0.35 |
| gi 229364492 emb CAY52336.1 | glucose-6-phosphate isomerase [Pseudomonas fluorescens SBW25]                                       | 252 | 0.34 |
| gi 229364100 emb CAY51711.1 | putative porin [Pseudomonas fluorescens SBW25]                                                      | 497 | 0.34 |
| gi 229364995 emb CAY53133.1 | aspartate carbamoyltransferase [Pseudomonas fluorescens SBW25]                                      | 116 | 0.34 |
| gi 229359606 emb CAY46448.1 | putative lipoprotein [Pseudomonas fluorescens SBW25]                                                | 39  | 0.34 |
| gi 229362693 emb CAY49603.1 | putative ferric alcaligin siderophore receptor [Pseudomonas fluorescens SBW25]                      | 388 | 0.32 |
| gi 229359775 emb CAY46625.1 | glutamine synthetase [Pseudomonas fluorescens SBW25]                                                | 557 | 0.32 |
| gi 229365298 emb CAY53646.1 | oxaloacetate decarboxylase alpha chain [Pseudomonas fluorescens SBW25]                              | 199 | 0.32 |
| gi 229359622 emb CAY46464.1 | succinate-semialdehyde dehydrogenase [NADP+] [Pseudomonas fluorescens SBW25]                        | 246 | 0.32 |
| gi 229363488 emb CAY50712.1 | putative 3-isopropylmalate dehydrogenase [Pseudomonas fluorescens SBW25]                            | 171 | 0.32 |
| gi 229360669 emb CAY47527.1 | 30S ribosomal protein S2 [Pseudomonas fluorescens SBW25]                                            | 42  | 0.3  |
| gi 229359476 emb CAY46317.1 | galactonate dehydratase [Pseudomonas fluorescens SBW25]                                             | 203 | 0.29 |
| gi 229364771 emb CAY52770.1 | elongation factor TU [Pseudomonas fluorescens SBW25]                                                | 845 | 0.28 |
| gi 229364029 emb CAY51593.1 | putative histidine-binding periplasmic protein precursor [Pseudomonas fluorescens SBW25]            | 55  | 0.28 |
| gi 229364672 emb CAY52606.1 | gamma-glutamyl phosphate reductase [Pseudomonas fluorescens SBW25]                                  | 313 | 0.27 |
| gi 229360689 emb CAY47547.1 | enolase [Pseudomonas fluorescens SBW25]                                                             | 202 | 0.27 |
| gi 229360561 emb CAY47418.1 | argininosuccinate synthase [Pseudomonas fluorescens SBW25]                                          | 120 | 0.27 |
| gi 229364772 emb CAY52772.1 | elongation factor G [Pseudomonas fluorescens SBW25]                                                 | 225 | 0.26 |
| gi 229363756 emb CAY51170.1 | putative fatty acid transport system, membrane protein [Pseudomonas fluorescens SBW25]              | 496 | 0.26 |
| gi 229362428 emb CAY49334.1 | putative carboxyvinyl-carboxyphosphonate phosphorylmotase [Pseudomonas fluorescens SBW25]           | 54  | 0.26 |
| gi 229364659 emb CAY52587.1 | putative lipoprotein [Pseudomonas fluorescens SBW25]                                                | 276 | 0.25 |
| gi 229360284 emb CAY47141.1 | fumarate hydratase class II [Pseudomonas fluorescens SBW25]                                         | 254 | 0.25 |
| gi 229364606 emb CAY52504.1 | putative TonB-dependent receptor protein [Pseudomonas fluorescens SBW25]                            | 408 | 0.24 |
| gi 229360973 emb CAY47833.1 | transaldolase B [Pseudomonas fluorescens SBW25]                                                     | 70  | 0.24 |
| gi 229365299 emb CAY53647.1 | biotin carboxylase [Pseudomonas fluorescens SBW25]                                                  | 136 | 0.23 |
| gi 229359912 emb CAY46766.1 | putative outer membrane protein [Pseudomonas fluorescens SBW25]                                     | 74  | 0.23 |
| gi 229362643 emb CAY49551.1 | putative rhizopine biosynthesis/dihydropicolinate synthase [Pseudomonas fluorescens SBW25]          | 109 | 0.23 |
| gi 229361213 emb CAY48077.1 | chaperone (heat shock protein) [Pseudomonas fluorescens SBW25]                                      | 168 | 0.22 |
| gi 229364218 emb CAY51902.1 | glyceraldehyde 3-phosphate dehydrogenase 1 [Pseudomonas fluorescens SBW25]                          | 65  | 0.22 |
| gi 229363644 emb CAY50984.1 | putative allantoicase [Pseudomonas fluorescens SBW25]                                               | 60  | 0.22 |
| gi 229360942 emb CAY47802.1 | fatty oxidation complex alpha subunit [Pseudomonas fluorescens SBW25]                               | 246 | 0.21 |
| gi 229363775 emb CAY51194.1 | conserved hypothetical protein [Pseudomonas fluorescens SBW25]                                      | 127 | 0.21 |
| gi 229361927 emb CAY48827.1 | putative TonB-dependent receptor [Pseudomonas fluorescens SBW25]                                    | 245 | 0.2  |
| gi 229362479 emb CAY49385.1 | phosphoglucosyltransferase [Pseudomonas fluorescens SBW25]                                          | 99  | 0.2  |
| gi 229360249 emb CAY47106.1 | NADP(H)-dependt aldo-keto reductase [Pseudomonas fluorescens SBW25]                                 | 75  | 0.2  |
| gi 229360742 emb CAY47600.1 | branched amino acid ABC transport system, substrate-binding protein [Pseudomonas fluorescens SBW25] | 53  | 0.2  |
| gi 229361031 emb CAY47893.1 | phosphoserine aminotransferase [Pseudomonas fluorescens SBW25]                                      | 43  | 0.2  |
| gi 229362324 emb CAY49226.1 | putative 4-hydroxyphenylpyruvate dioxygenase [Pseudomonas fluorescens SBW25]                        | 39  | 0.2  |
| gi 229360794 emb CAY47652.1 | periplasmic beta-glucosidase precursor [Pseudomonas fluorescens SBW25]                              | 93  | 0.19 |
| gi 229360447 emb CAY47304.1 | iron (III) dicitrate transport protein precursor [Pseudomonas fluorescens SBW25]                    | 74  | 0.19 |

|                             |                                                                                                        |     |      |
|-----------------------------|--------------------------------------------------------------------------------------------------------|-----|------|
| gi 229362518 emb CAY49425.1 | 3-oxoacyl-[acyl-carrier-protein] synthase II [Pseudomonas fluorescens SBW25]                           | 370 | 0.19 |
| gi 229360943 emb CAY47803.1 | 3-ketoacyl-CoA thiolase [Pseudomonas fluorescens SBW25]                                                | 266 | 0.19 |
| gi 229362548 emb CAY49455.1 | putative secreted pectate lyase [Pseudomonas fluorescens SBW25]                                        | 152 | 0.19 |
| gi 229360870 emb CAY47729.1 | putative lipoprotein [Pseudomonas fluorescens SBW25]                                                   | 124 | 0.19 |
| gi 229360677 emb CAY47535.1 | putative surface exported protein [Pseudomonas fluorescens SBW25]                                      | 112 | 0.18 |
| gi 229360332 emb CAY47189.1 | conserved hypothetical protein [Pseudomonas fluorescens SBW25]                                         | 530 | 0.18 |
| gi 229360121 emb CAY46975.1 | putative lipoprotein [Pseudomonas fluorescens SBW25]                                                   | 40  | 0.18 |
| gi 229364996 emb CAY53136.1 | dihydroorotase-like protein [Pseudomonas fluorescens SBW25]                                            | 167 | 0.18 |
| gi 229363740 emb CAY51145.1 | aspartate aminotransferase [Pseudomonas fluorescens SBW25]                                             | 149 | 0.18 |
| gi 229361218 emb CAY48082.1 | 3-oxoacyl-[acyl-carrier-protein] synthase I [Pseudomonas fluorescens SBW25]                            | 121 | 0.18 |
| gi 229359832 emb CAY46682.1 | putative NADP-dependent malic enzyme [Pseudomonas fluorescens SBW25]                                   | 248 | 0.17 |
| gi 229364144 emb CAY51781.1 | arginine deiminase [Pseudomonas fluorescens SBW25]                                                     | 154 | 0.17 |
| gi 229363227 emb CAY50310.1 | ATP-dependent specificity component of clpP serine protease, chaperone [Pseudomonas fluorescens SBW25] | 140 | 0.17 |
| gi 229363655 emb CAY51001.1 | putative aspartyl aminopeptidase [Pseudomonas fluorescens SBW25]                                       | 81  | 0.17 |
| gi 229364576 emb CAY52461.1 | serine hydroxymethyltransferase [Pseudomonas fluorescens SBW25]                                        | 55  | 0.17 |
| gi 229360931 emb CAY47791.1 | aconitate hydratase 1 [Pseudomonas fluorescens SBW25]                                                  | 127 | 0.16 |
| gi 229364030 emb CAY51594.1 | acetyl-coenzyme A synthetase [Pseudomonas fluorescens SBW25]                                           | 87  | 0.16 |
| gi 229361205 emb CAY48069.1 | dihydrolipoyl dehydrogenase [Pseudomonas fluorescens SBW25]                                            | 146 | 0.16 |
| gi 229363866 emb CAY51338.1 | guanine deaminase [Pseudomonas fluorescens SBW25]                                                      | 58  | 0.16 |
| gi 229363123 emb CAY50142.1 | NADH dehydrogenase I chain F [Pseudomonas fluorescens SBW25]                                           | 36  | 0.16 |
| gi 229364150 emb CAY51790.1 | glycine dehydrogenase [decarboxylating] [Pseudomonas fluorescens SBW25]                                | 407 | 0.15 |
| gi 229365287 emb CAY53626.1 | aspartate ammonia-lyase [Pseudomonas fluorescens SBW25]                                                | 137 | 0.15 |
| gi 229364959 emb CAY53075.1 | adenosylhomocysteinase [Pseudomonas fluorescens SBW25]                                                 | 80  | 0.15 |
| gi 229365209 emb CAY53495.1 | putative aldehyde dehydrogenase [Pseudomonas fluorescens SBW25]                                        | 51  | 0.15 |
| gi 229362242 emb CAY49144.1 | CDP-diacylglycerol-serine O-phosphatidyltransferase [Pseudomonas fluorescens SBW25]                    | 46  | 0.15 |
| gi 229360333 emb CAY47190.1 | putative exported protein [Pseudomonas fluorescens SBW25]                                              | 43  | 0.15 |
| gi 229362536 emb CAY49443.1 | putative diaminobutyrate--2-oxoglutarate aminotransferase [Pseudomonas fluorescens SBW25]              | 38  | 0.15 |
| gi 229360401 emb CAY47258.1 | conserved hypothetical protein [Pseudomonas fluorescens SBW25]                                         | 35  | 0.15 |
| gi 229362669 emb CAY49579.1 | putative amidase [Pseudomonas fluorescens SBW25]                                                       | 162 | 0.14 |
| gi 229364641 emb CAY52559.1 | AMP nucleosidase [Pseudomonas fluorescens SBW25]                                                       | 418 | 0.14 |
| gi 229363888 emb CAY51376.1 | putative phosphoenolpyruvate synthase [Pseudomonas fluorescens SBW25]                                  | 203 | 0.13 |
| gi 229364293 emb CAY52028.1 | GMP synthase (glutamine-hydrolyzing) [Pseudomonas fluorescens SBW25]                                   | 55  | 0.13 |
| gi 229359950 emb CAY46804.1 | ribonuclease R [Pseudomonas fluorescens SBW25]                                                         | 82  | 0.12 |
| gi 229360147 emb CAY47004.1 | conserved hypothetical protein [Pseudomonas fluorescens SBW25]                                         | 97  | 0.12 |
| gi 229365348 emb CAY53726.1 | ATP synthase gamma chain [Pseudomonas fluorescens SBW25]                                               | 67  | 0.12 |
| gi 229361036 emb CAY47898.1 | 30S ribosomal protein S1 [Pseudomonas fluorescens SBW25]                                               | 58  | 0.12 |
| gi 229365033 emb CAY53201.1 | dihydroxy-acid dehydratase [Pseudomonas fluorescens SBW25]                                             | 45  | 0.12 |
| gi 229361242 emb CAY48106.1 | putative dipeptidase [Pseudomonas fluorescens SBW25]                                                   | 39  | 0.12 |
| gi 229364170 emb CAY51826.1 | aspartyl-tRNA synthetase [Pseudomonas fluorescens SBW25]                                               | 36  | 0.12 |
| gi 229361203 emb CAY48067.1 | 2-oxoglutarate dehydrogenase E1 component [Pseudomonas fluorescens SBW25]                              | 128 | 0.11 |

|                             |                                                                                                                           |     |      |
|-----------------------------|---------------------------------------------------------------------------------------------------------------------------|-----|------|
| gi 229360459 emb CAY47316.1 | valyl-tRNA synthetase [Pseudomonas fluorescens SBW25]                                                                     | 62  | 0.11 |
| gi 229361399 emb CAY48274.1 | tail-specific protease precursor [Pseudomonas fluorescens SBW25]                                                          | 59  | 0.1  |
| gi 229359454 emb CAY46295.1 | glycyl-tRNA synthetase beta chain (ec 6.1.1.14) (glycine--trna ligase beta chain) (glyrs) [Pseudomonas fluorescens SBW25] | 59  | 0.1  |
| gi 229362684 emb CAY49594.1 | putative glycogen debranching protein [Pseudomonas fluorescens SBW25]                                                     | 65  | 0.09 |
| gi 229364285 emb CAY52013.1 | phosphoribosylformylglycinamide synthase [Pseudomonas fluorescens SBW25]                                                  | 304 | 0.08 |
| gi 229360194 emb CAY47051.1 | chaperone [Pseudomonas fluorescens SBW25]                                                                                 | 66  | 0.08 |
| gi 229360639 emb CAY47497.1 | phosphoenolpyruvate carboxylase [Pseudomonas fluorescens SBW25]                                                           | 55  | 0.08 |
| gi 229362012 emb CAY48913.1 | putative aminopeptidase N [Pseudomonas fluorescens SBW25]                                                                 | 31  | 0.08 |
| gi 229364817 emb CAY52842.1 | putative exported organic solvent tolerance protein [Pseudomonas fluorescens SBW25]                                       | 141 | 0.07 |
