# Supplementary material for: eDNA, Amyloid Fibers and Membrane Vesicles Identified in Pseudomonas fluorescens SBW25 Biofilms
Source: MDPI journal article supplement (doi:10.3390/ijms232315096), 2022-12-01
Supplement: s1 [file s1]

Table S1: GLM details and effects tests

| Effects                                                | NParm | DF | Response variables   |                     |                       |
|--------------------------------------------------------|-------|----|----------------------|---------------------|-----------------------|
|                                                        |       |    | Microcosm<br>Biomass | Biofilm<br>Strength | Biofilm<br>Attachment |
|                                                        |       |    | P Value              | P Value             | P Value               |
| <i>Biofilm type</i> (Viscous Mass & Wrinkly Spreader)  | 1     | 1  | < 0.01               | < 0.01              | < 0.01                |
| <i>DNA treatment</i> (Ctrl, LMW, HMW)                  | 2     | 2  | < 0.01               | < 0.01              | < 0.01                |
| <i>DNA concentration</i> (0, 100, 300 & 600 µg/ml)     | 1     | 1  | 0.58                 | 0.92                | 0.21                  |
| <i>Replicate</i> (1 - 8)                               | 7     | 7  | 0.10                 | 0.38                | 0.03*                 |
| <i>Biofilm type</i> x <i>DNA treatment</i> interaction | 2     | 2  | < 0.01               | < 0.01              | < 0.01                |

Three separate GLM models were run with microcosm biomass (growth), biofilm strength and biofilm attachment as Response variables. *Biofilm type* (categorical variable), *DNA treatment* (categorical variable), *DNA concentration* (continuous variable) and *Replicate* (categorical variable) as effects, and *Biofilm type* x *DNA treatment* as an interaction (note that *Replicate* could not be modelled as a random effect because model residuals were not Normally distributed). Model summaries (all statistics rounded up to two decimal places): Microcosm biomass ( $OD_{600}$ ),  $r^2 = 0.77$ ; ANOVA,  $F_{13,93} = 23.40$ ,  $P < 0.01$ ; Biofilm strength (MDM, g),  $r^2 = 0.86$ ; ANOVA,  $F_{13,93} = 44.81$ ,  $P < 0.01$ ; Biofilm attachment ( $A_{570}$ ),  $r^2 = 0.72$ ; ANOVA,  $F_{13,93} = 17.98$ ,  $P < 0.01$ . NParm, Number of parameters; DF, Degrees of Freedom. \* Effect further examined by LSMeans Differences Tukey HSD and no significant difference between means was found ( $Q = 3.10$ ,  $\alpha = 0.05$ ).
